# Supplementary material for: 1,5-Dichloroethanoanthracene Derivatives As Antidepressant Maprotiline Analogs: Synthesis, DFT Computational Calculations, and Molecular Docking
Source: Hindawi journal article supplement (doi:10.1155/2022/1196244), 2022-09-23
Supplement: f1 [file 1196244.f1.docx]

**Supporting Information**

**1,5-dichloroethanoanthracene Derivatives as Antidepressant Maprotiline Analogues: Synthesis, DFT Computational Calculations and Molecular Docking**

**Mujeeb A. Sultan 1*, Renjith raveendran pillai 2, Eman Alzahrani 3 , Ahmed A. Alsofi 1, Saddam A. Al-Qadhi1, Rami Adel Pashameah 4**

1 Department of Pharmacy, Faculty of Medical Sciences, Aljanad University for Science and Technology, Taiz, Yemen.

2 Department of Physics, University College, Thiruvananthapuram, Kerala, India.

3 *Department of Chemistry, College of Science, Taif University, P.O. Box 11099, Taif 21944, Saudi Arabia*

4 Department of Chemistry, Faculty of Applied Science, Umm Al-Qura University, Makkah 24230, Saudi Arabia

* Corresponding Author: Mujeeb A. Sultan, Email: [Mujeeb.aa@just.edu.ye](mailto:Mujeeb.aa@just.edu.ye), [Alhosami1983@gmail.com](mailto:Alhosami1983@gmail.com); Tel (+967775873672, +967717079911)

**Fig. S1.** 1H-NMR spectrum of the crude compound **2**


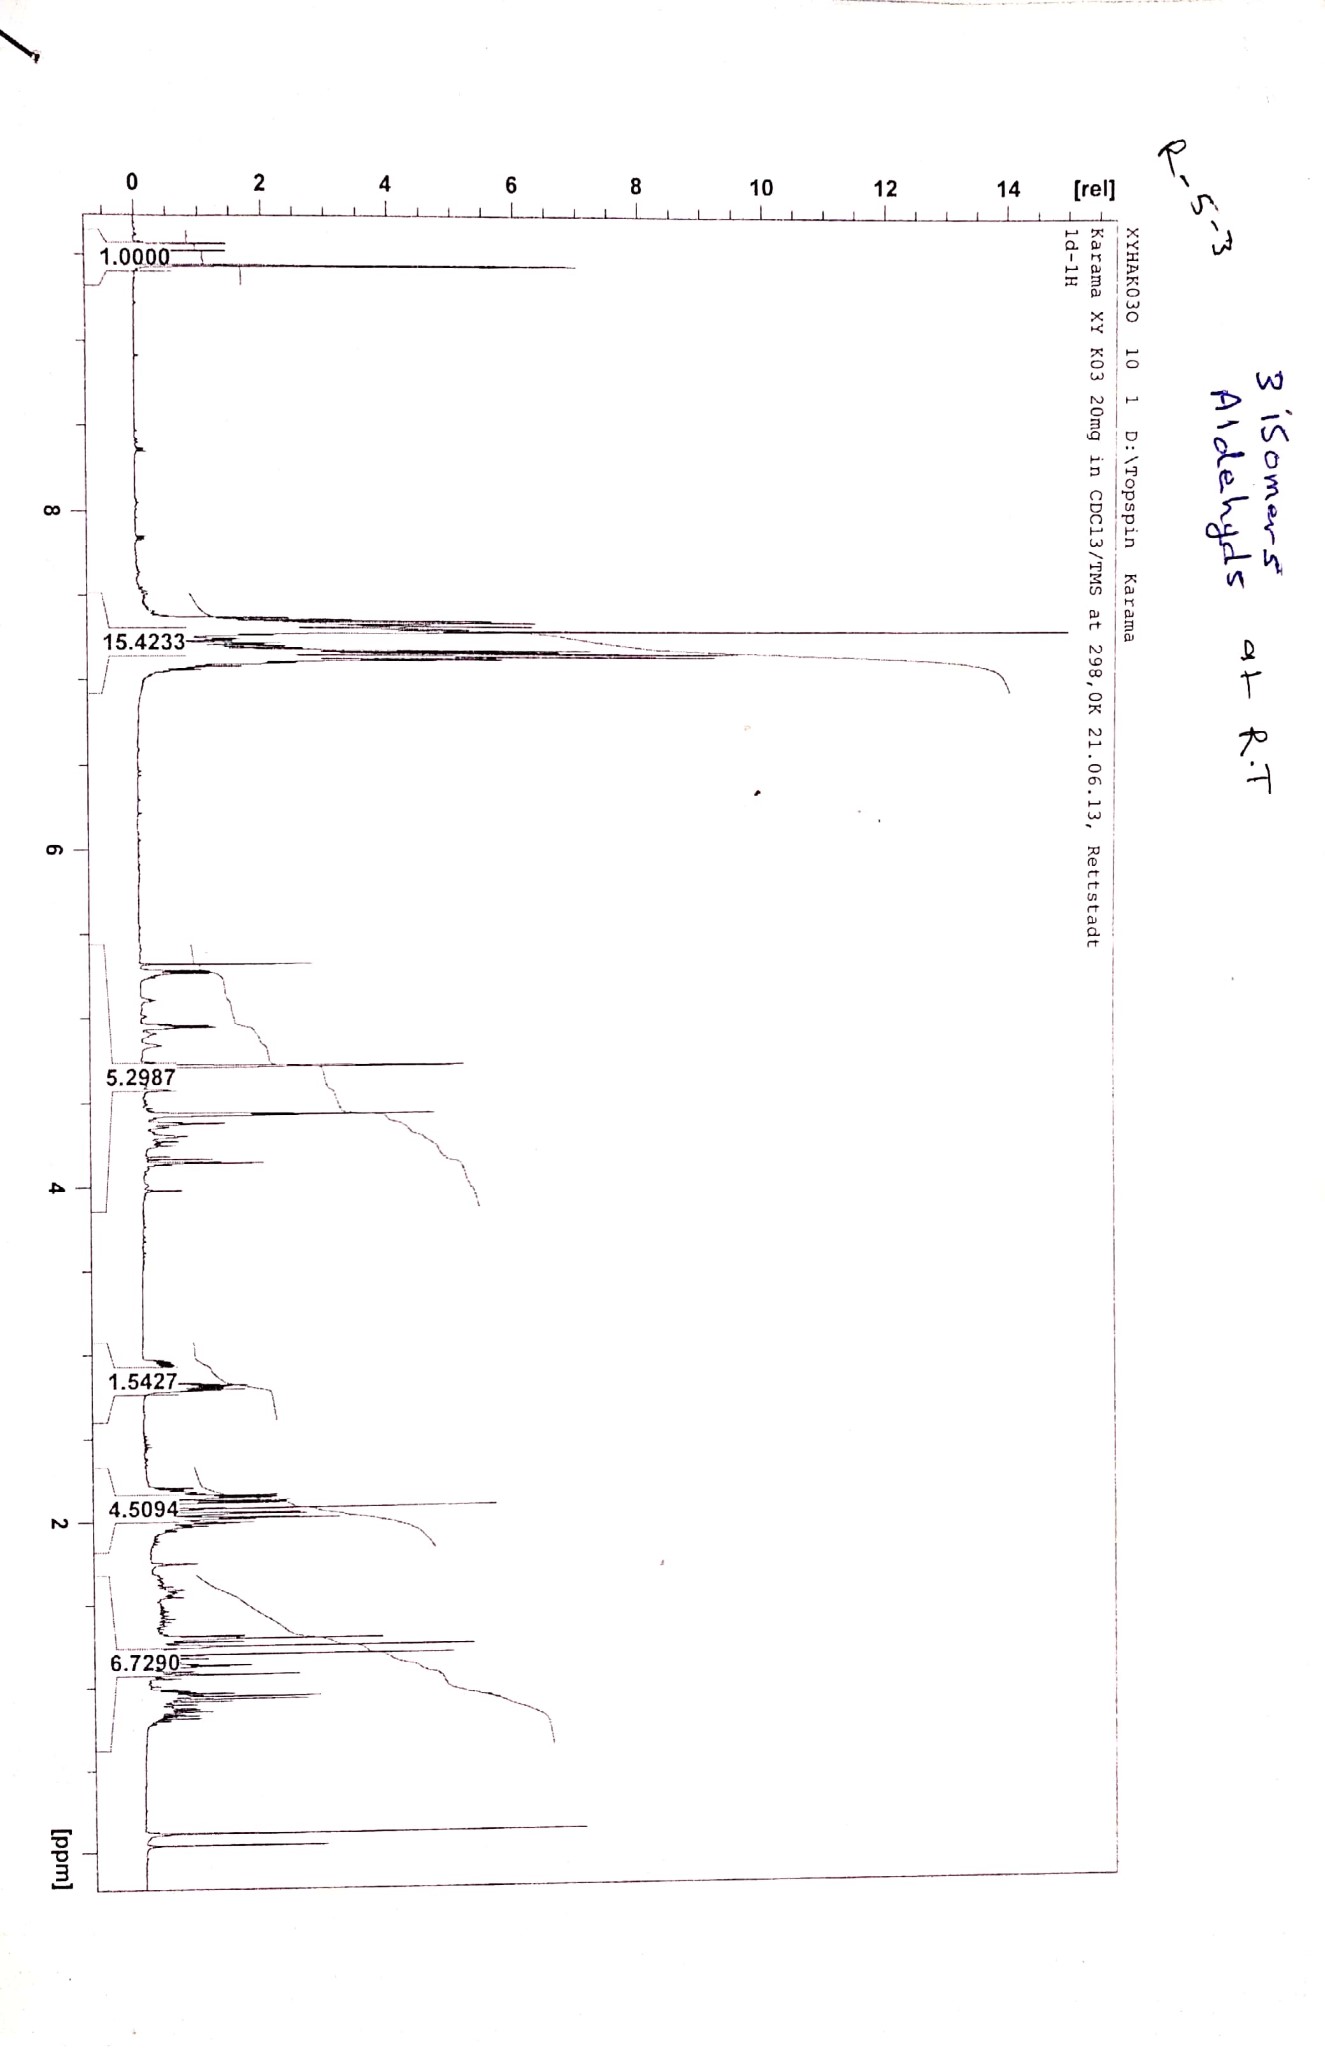

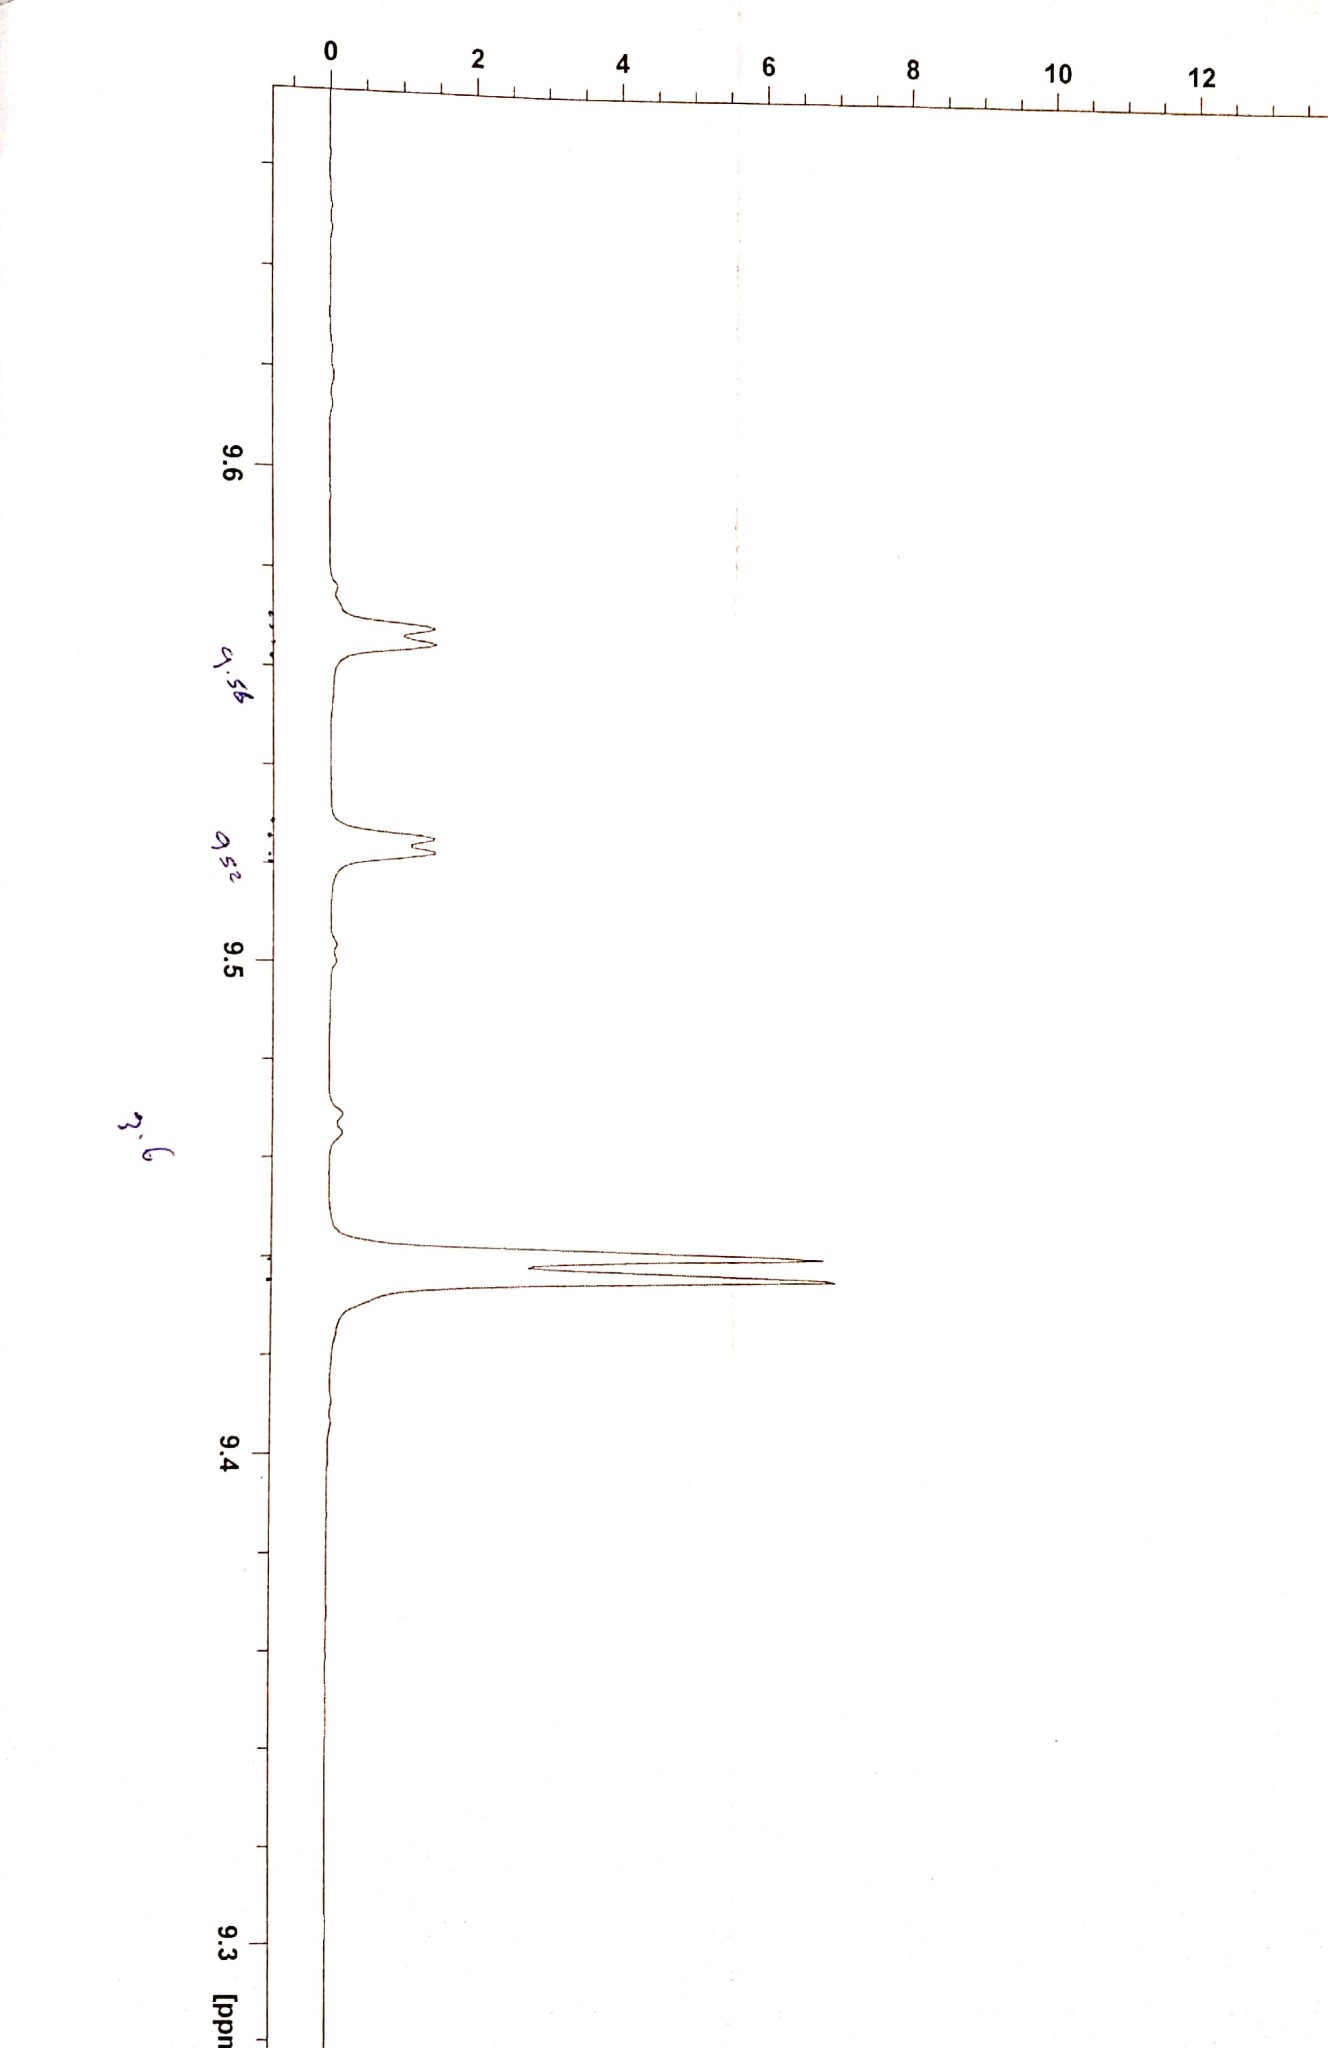


***
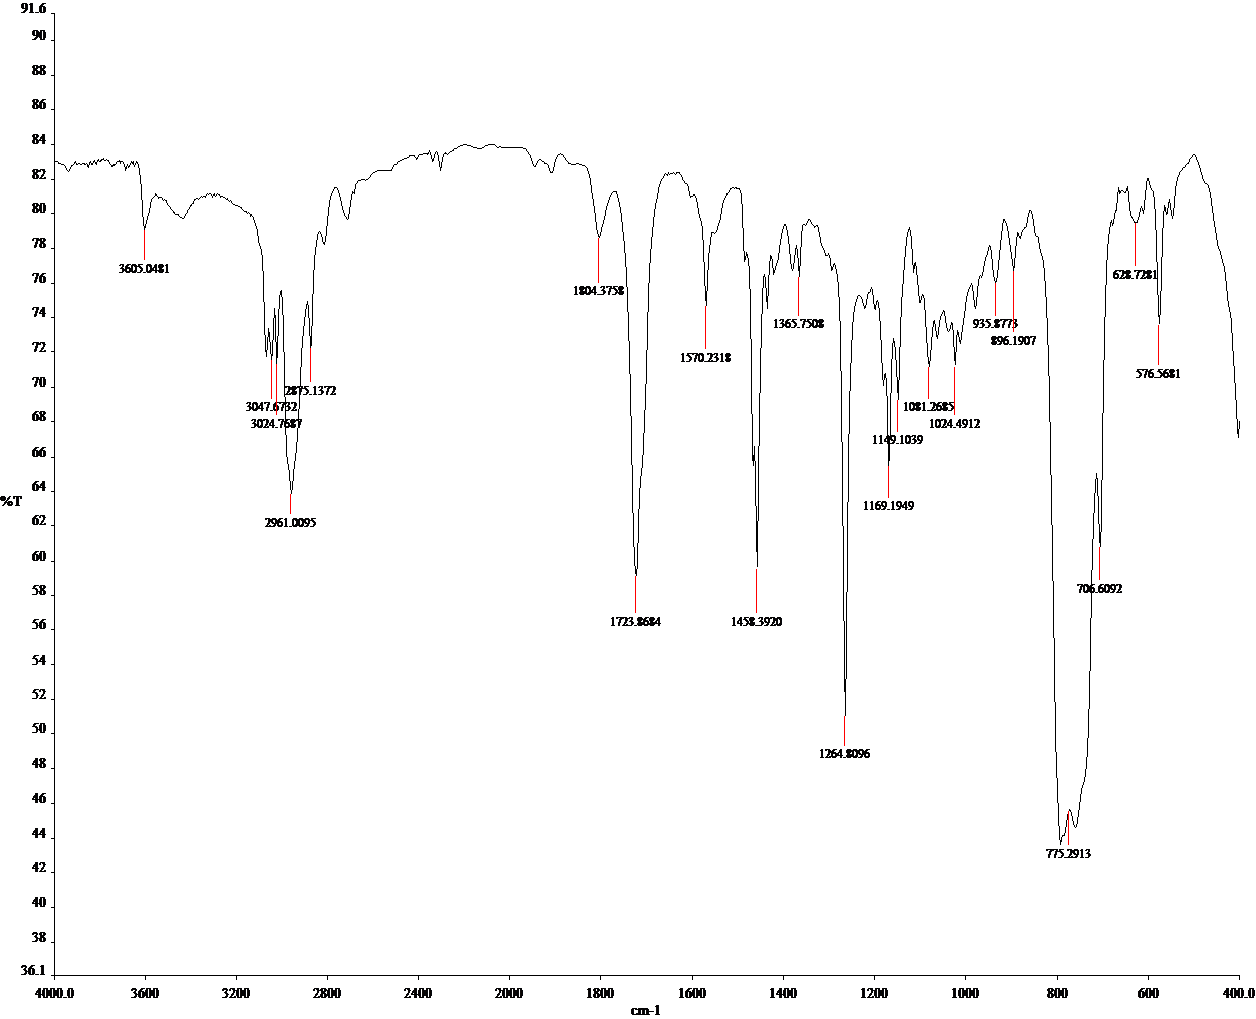
***

**Fig. S2.** IR spectrum of the crude compound **2**

**Fig. S3.** a)1H-NMR spectrum of the **2a**, b) 1H-NMR spectrum of the **2b**, c) Partial 1H-NMR spectrum of the bridgehead protons (H-C9 and H-C10) of the **2a.**


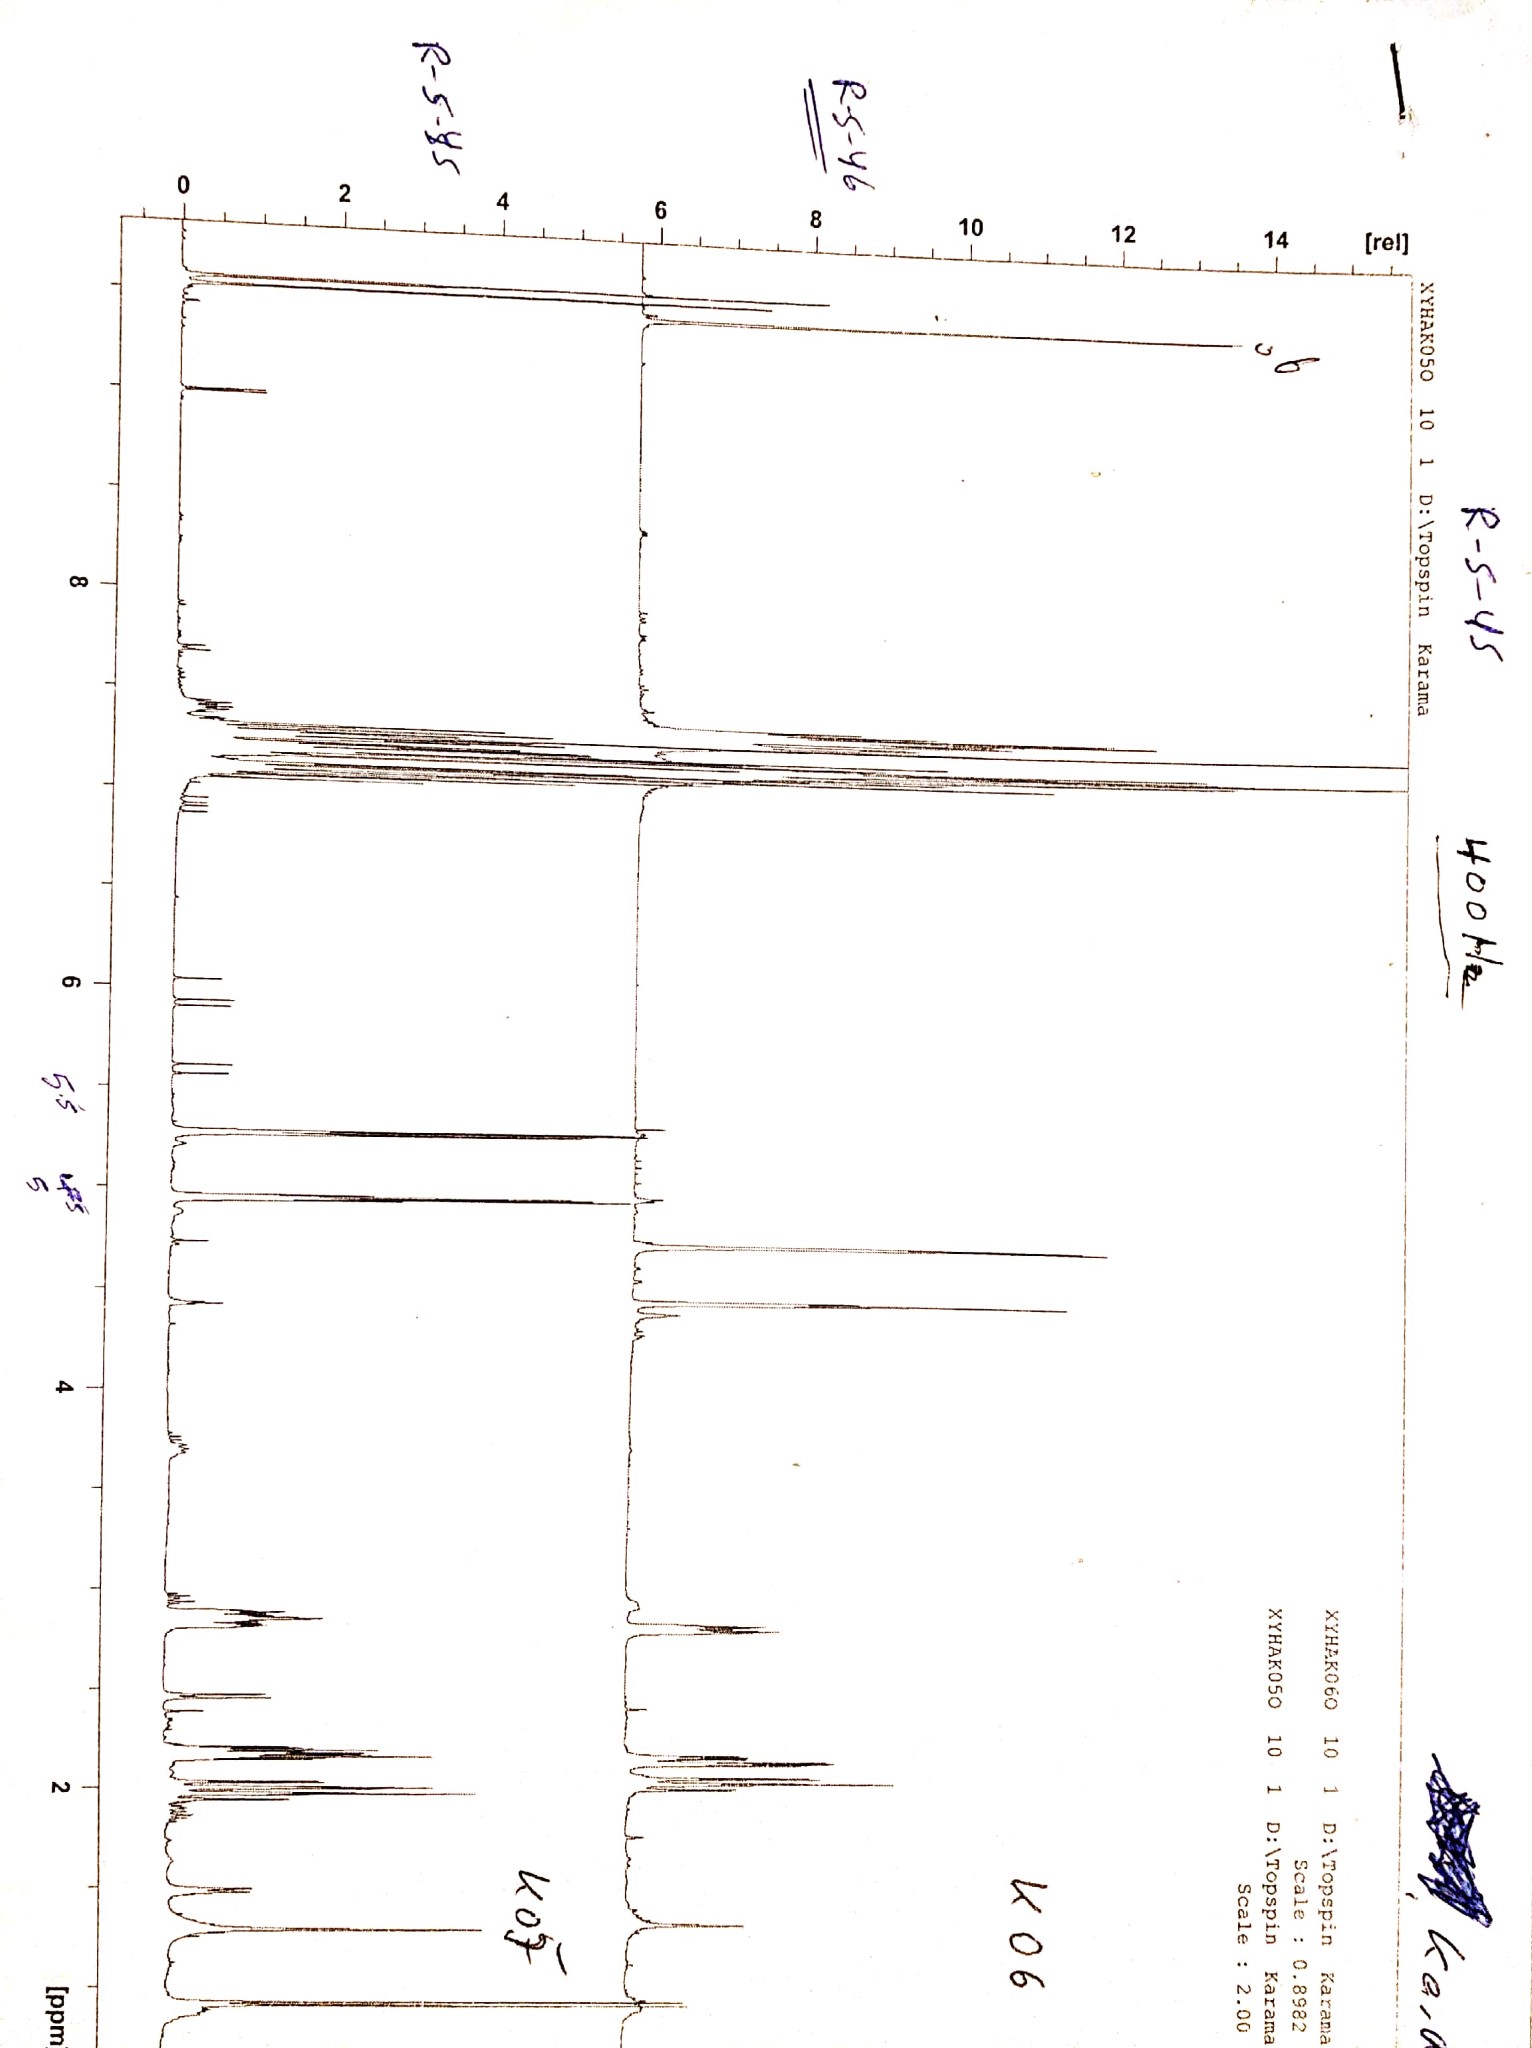

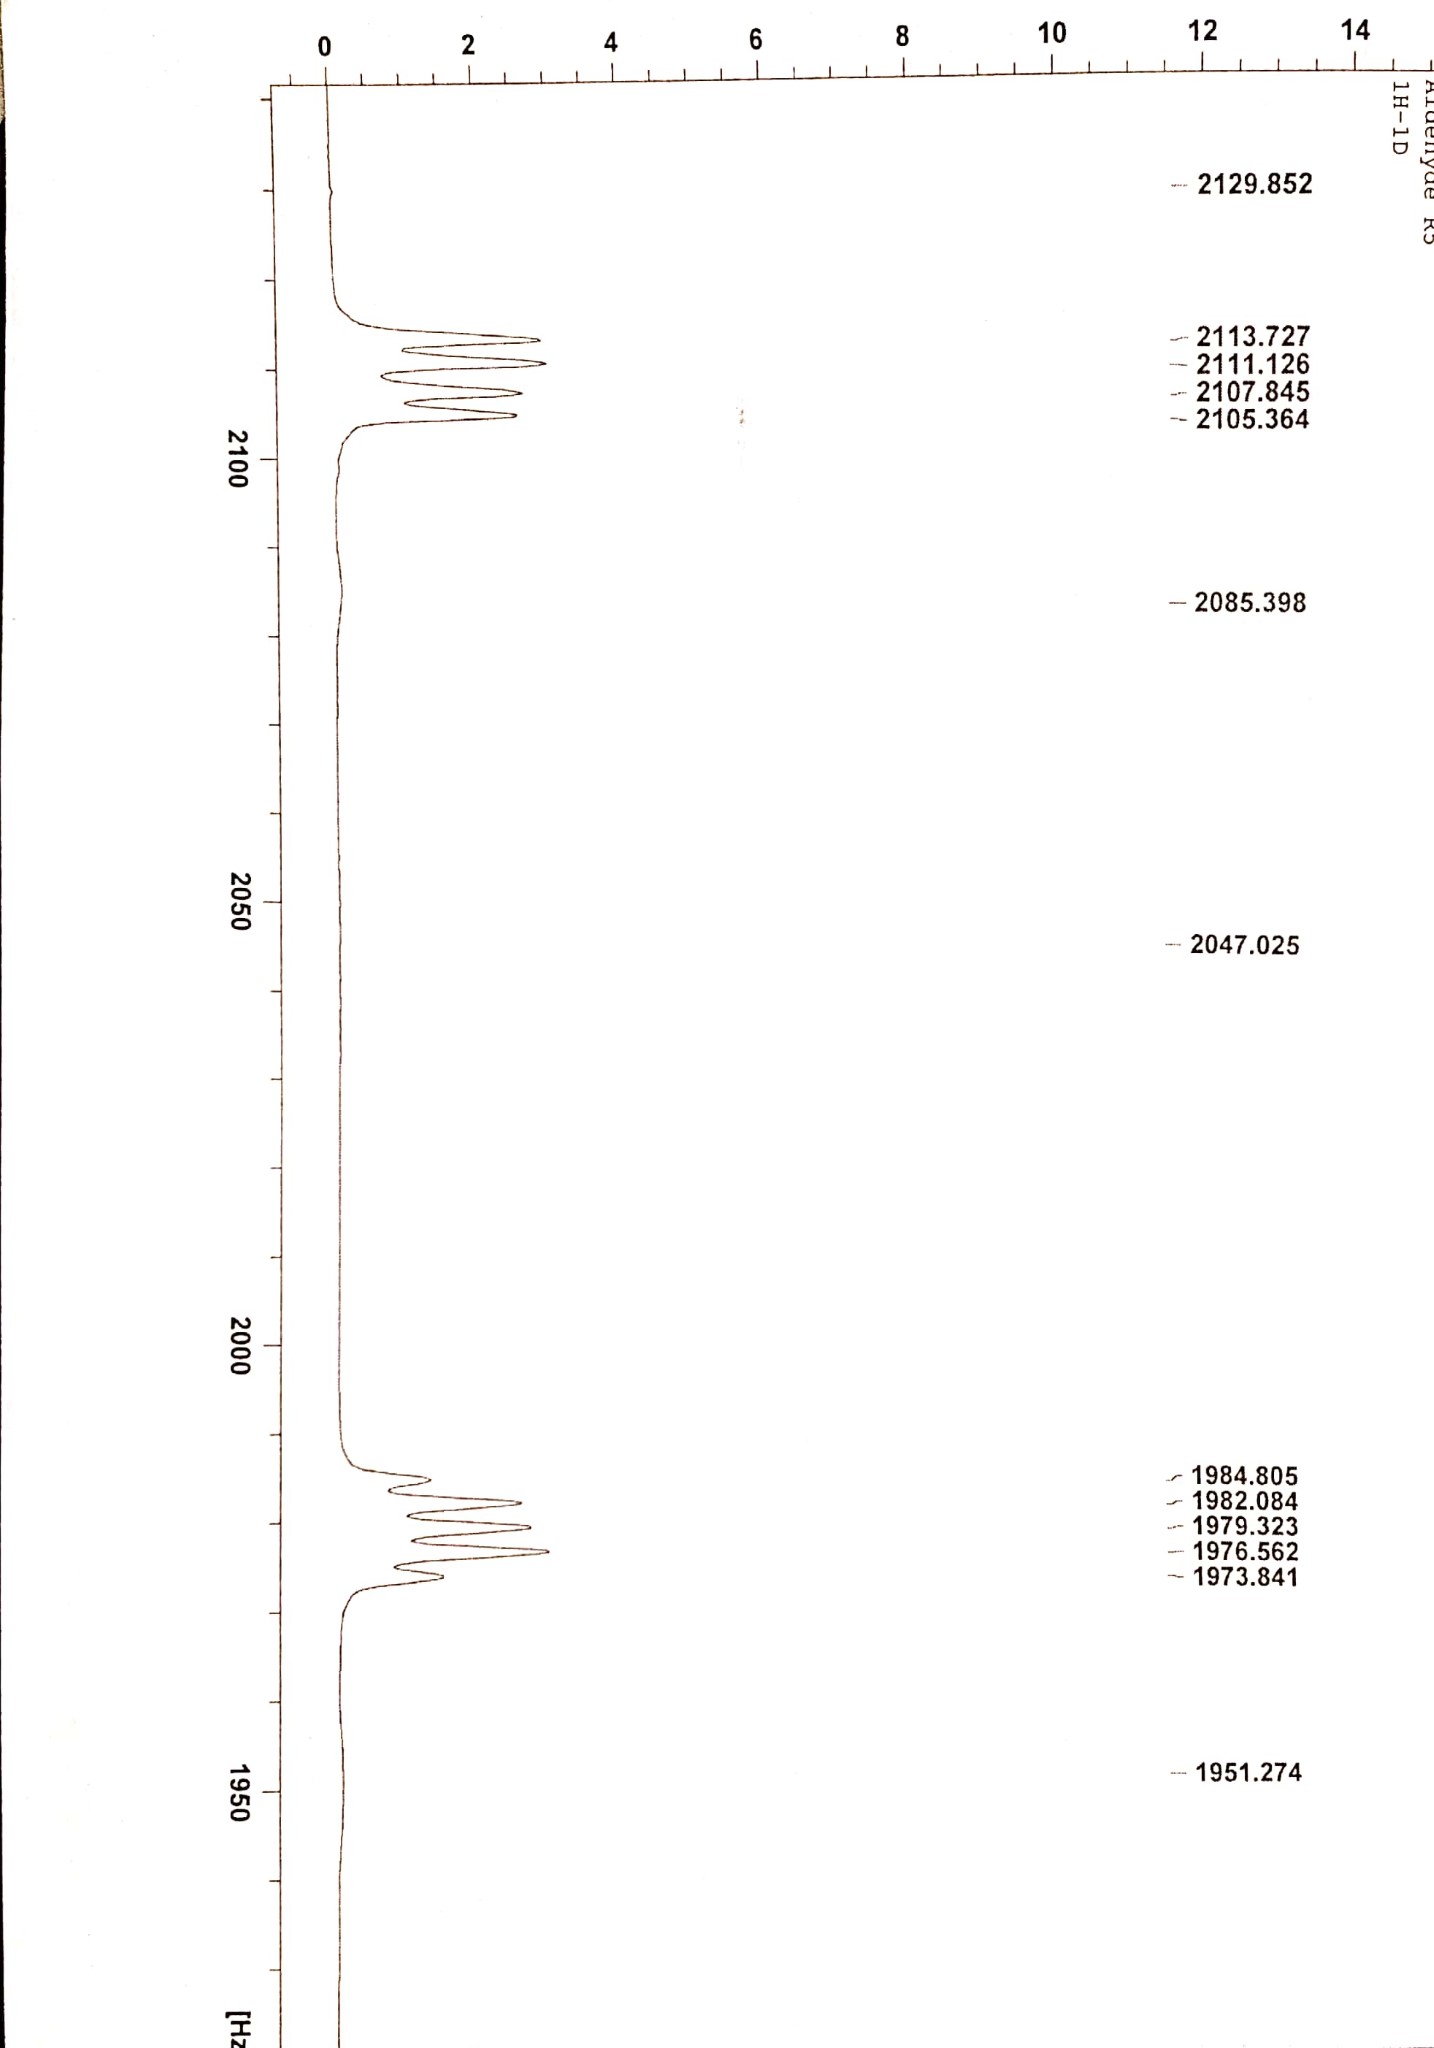


**
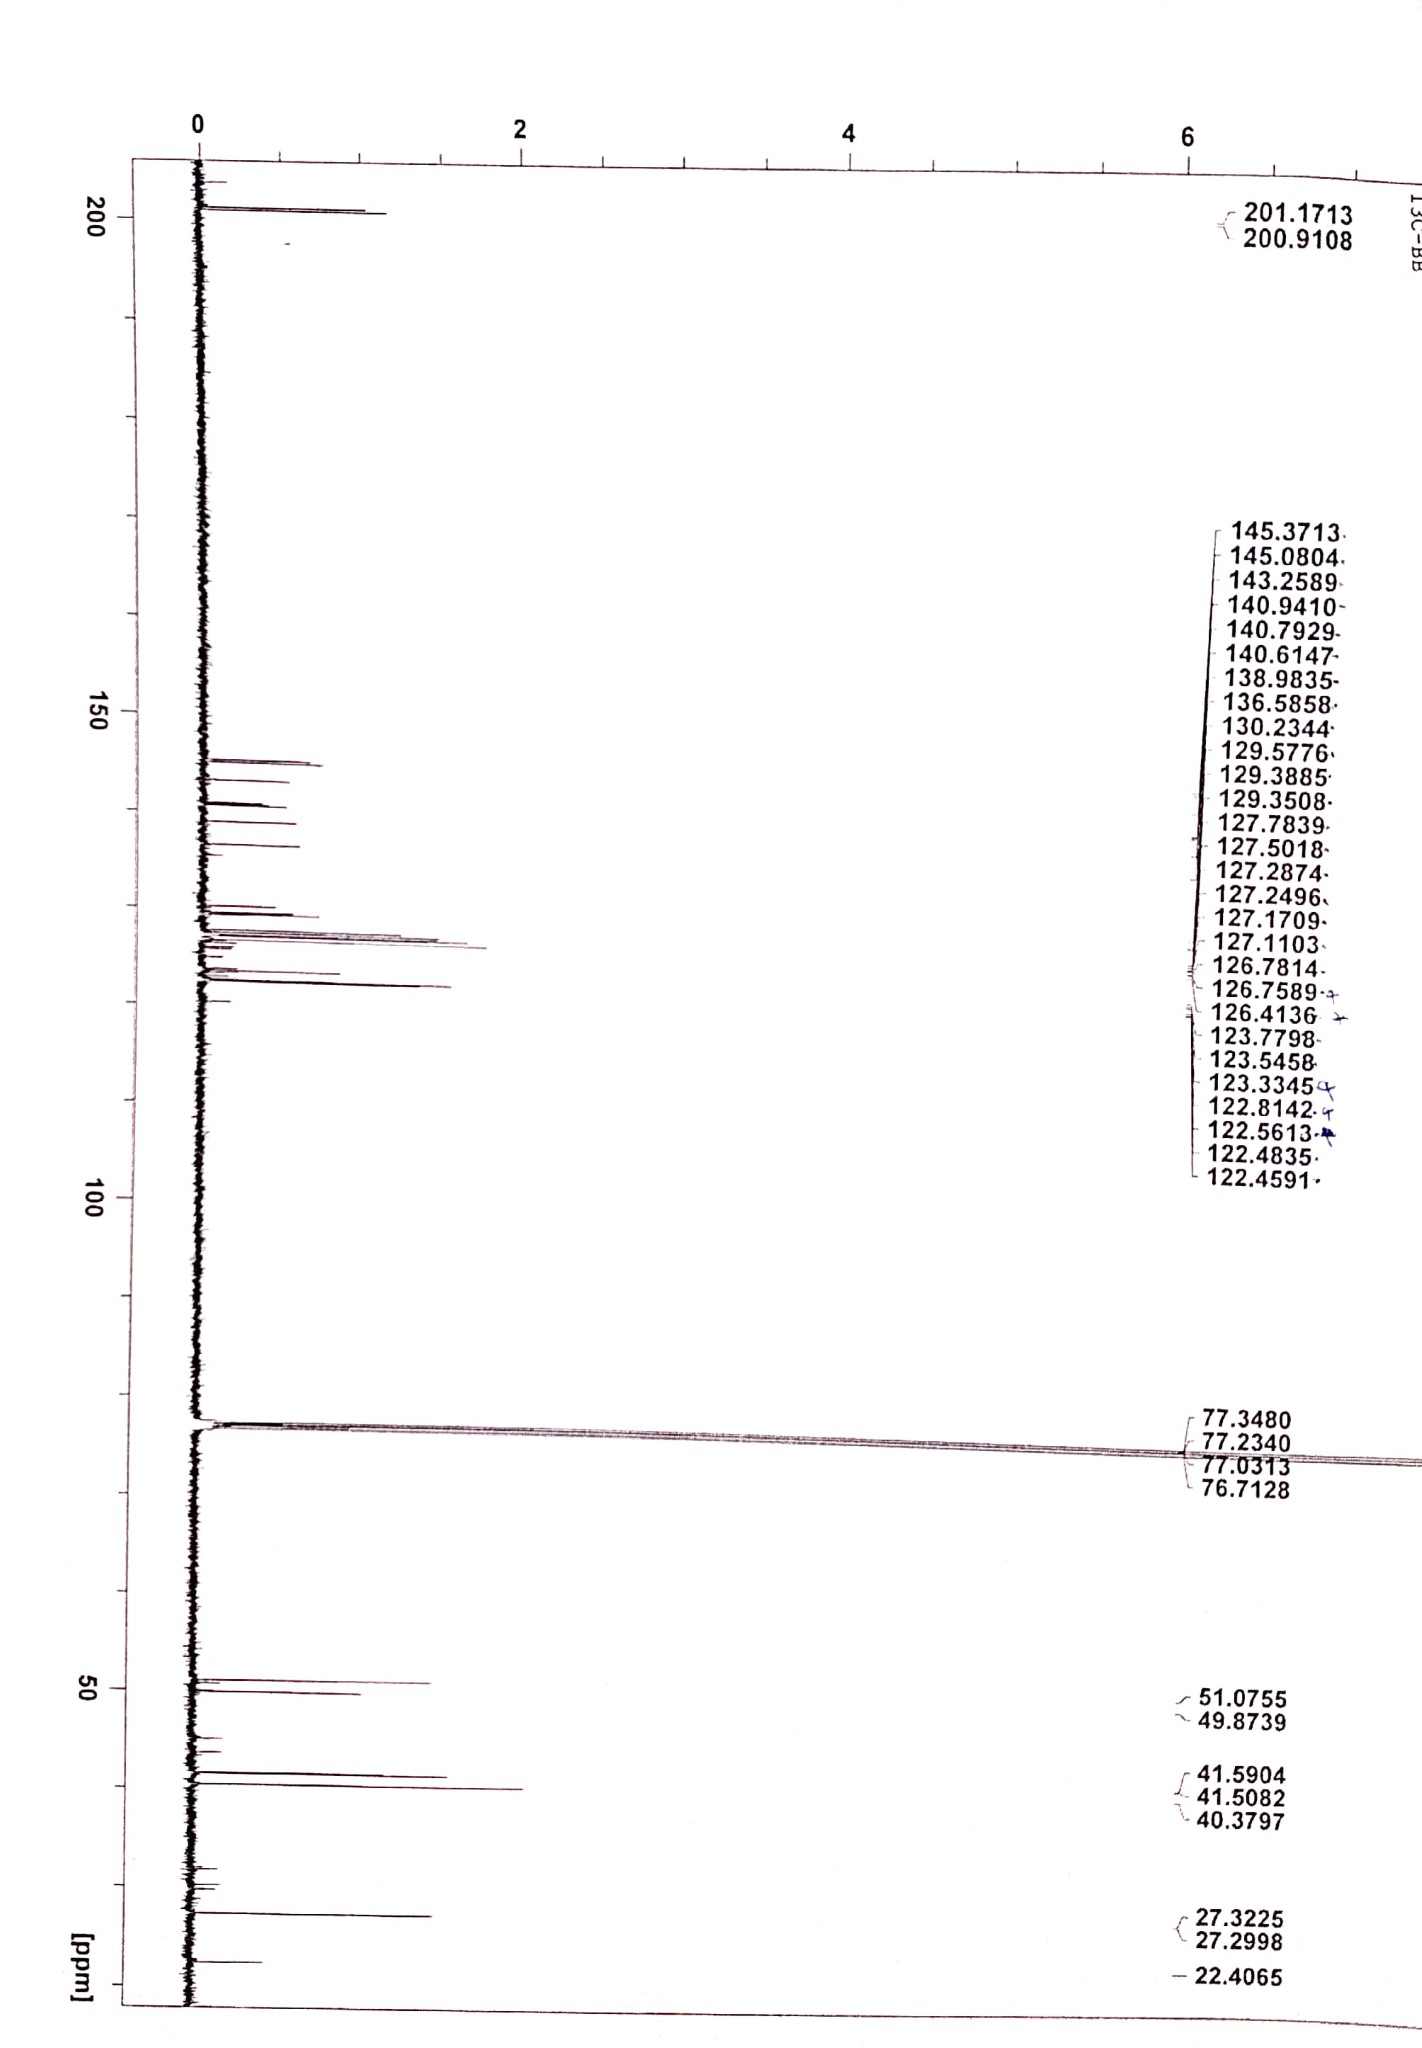
**

**Fig. S4.** 13C-NMR spectrum of the **2a**

**Fig. S5.** a)1H-NMR spectrum of the **2b**, b) Partial 1H-NMR spectrum of the bridgehead protons (H-C9 and H-C10) of the **2b.**


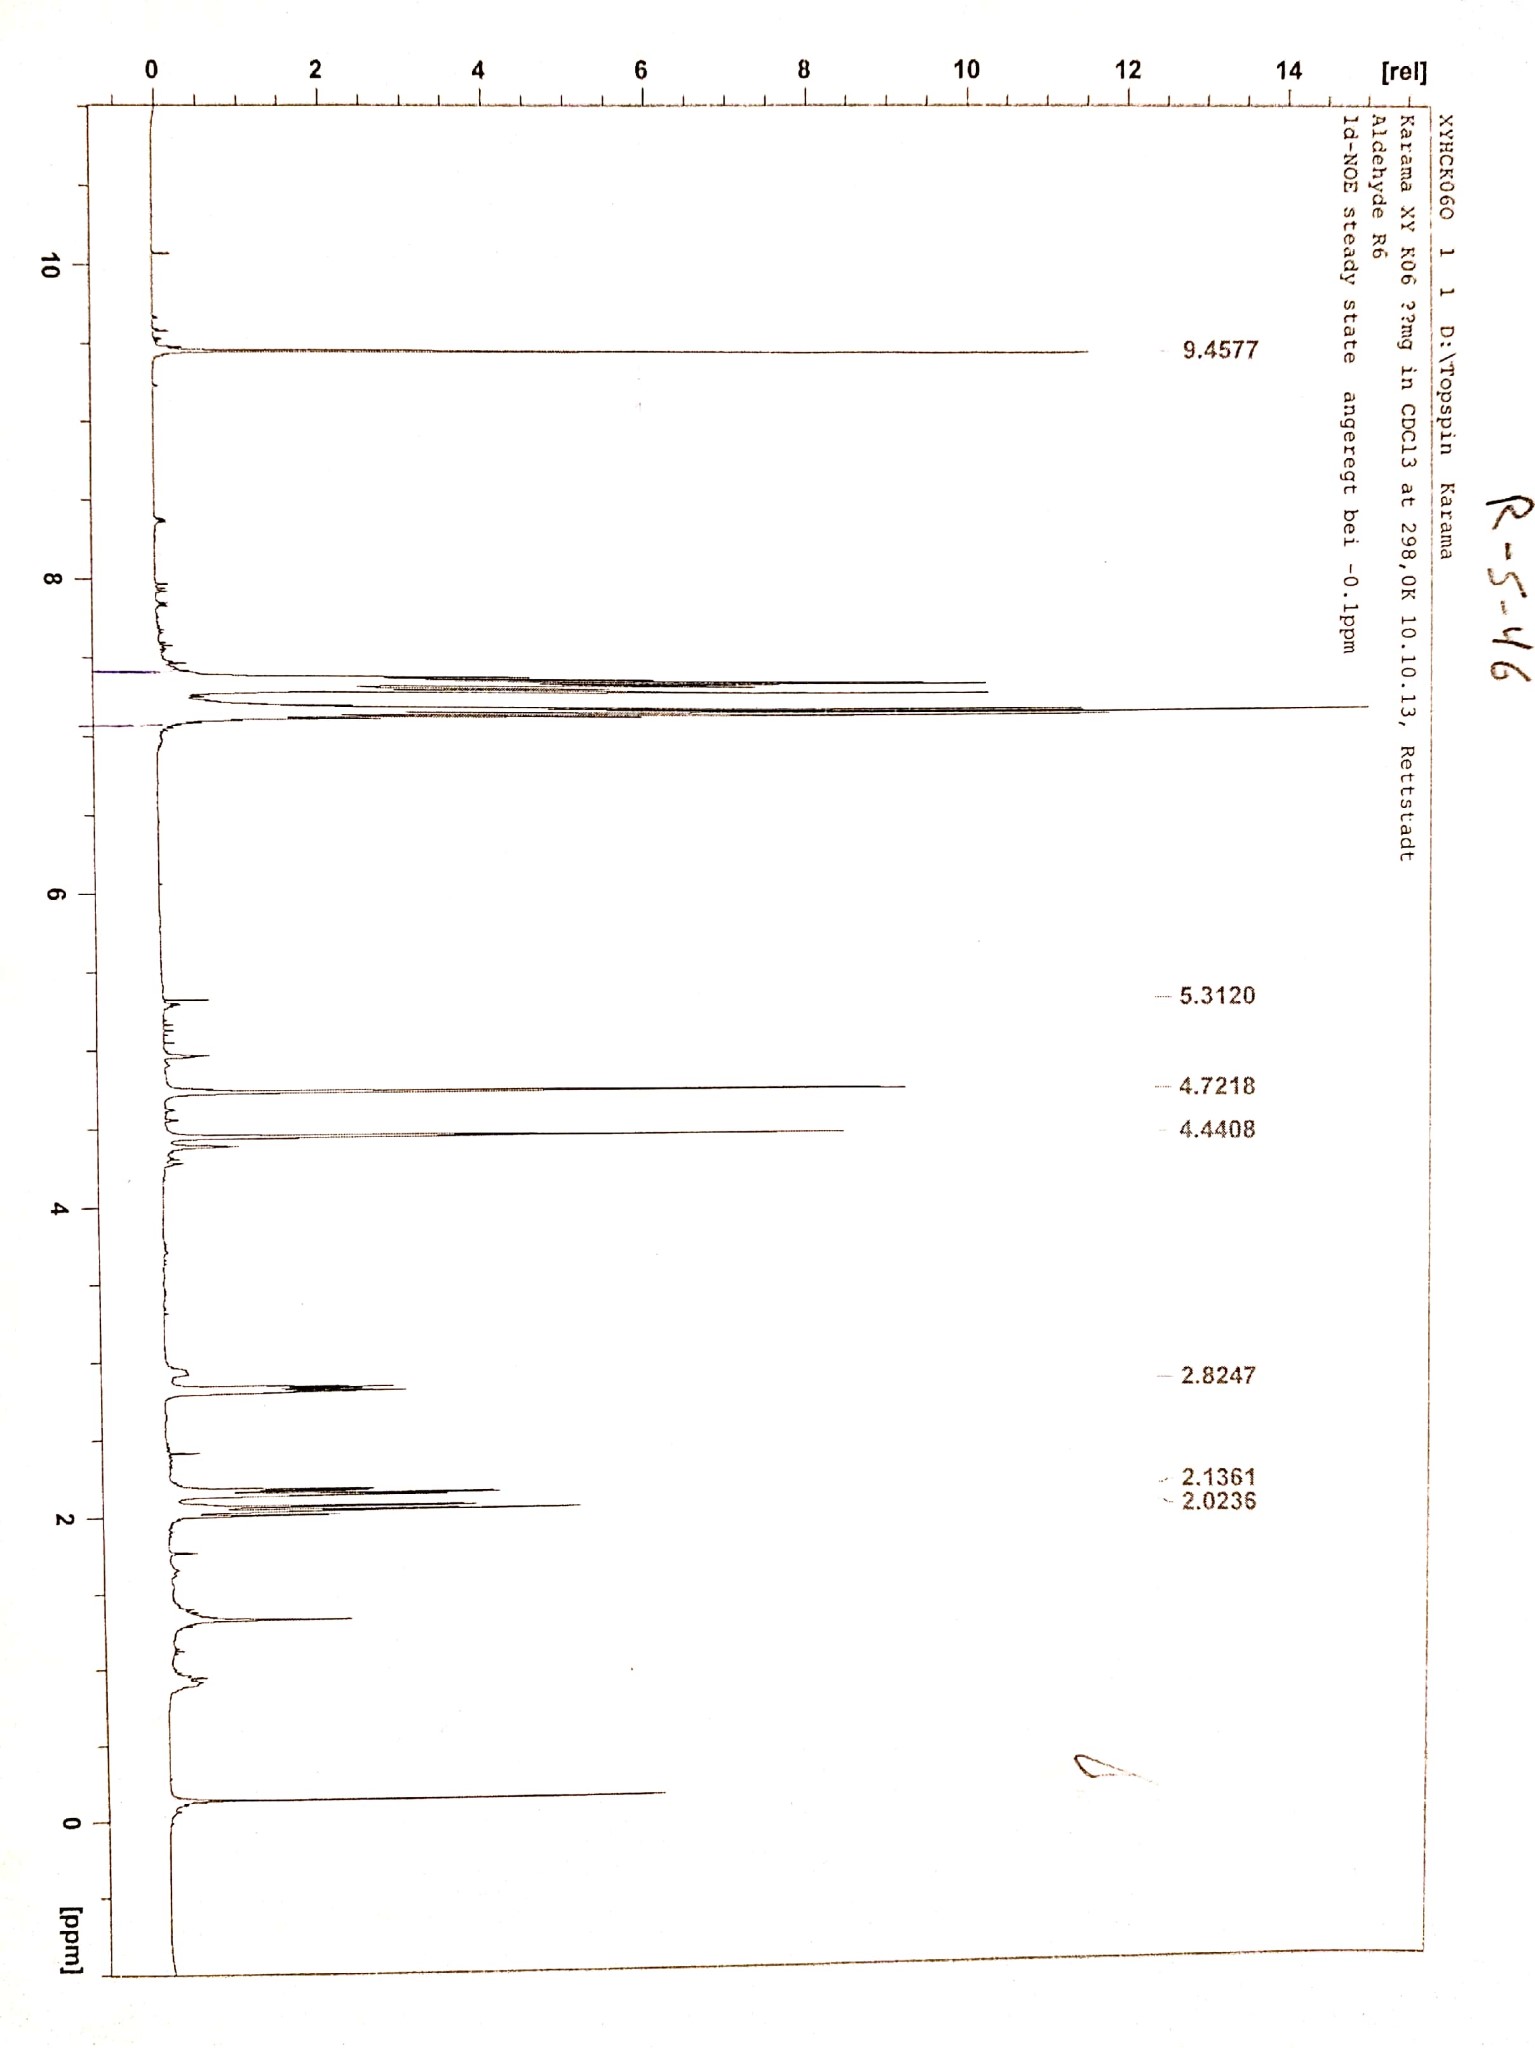

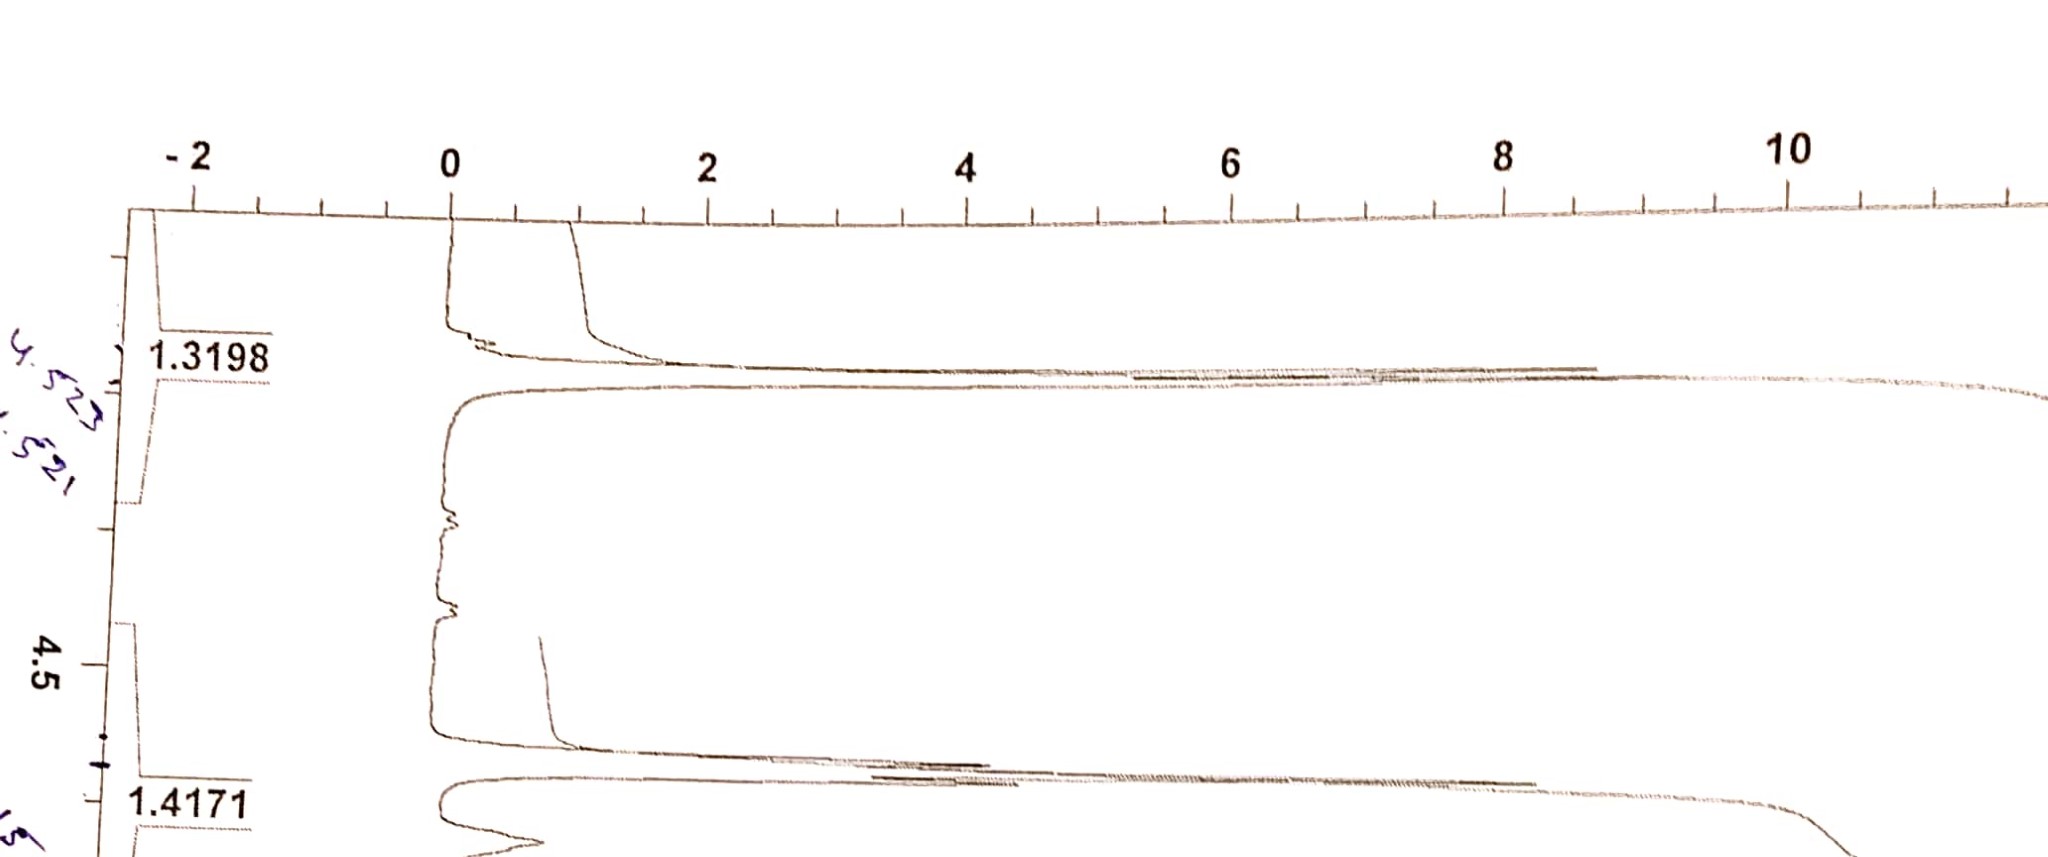


**b)**

**a)**

**
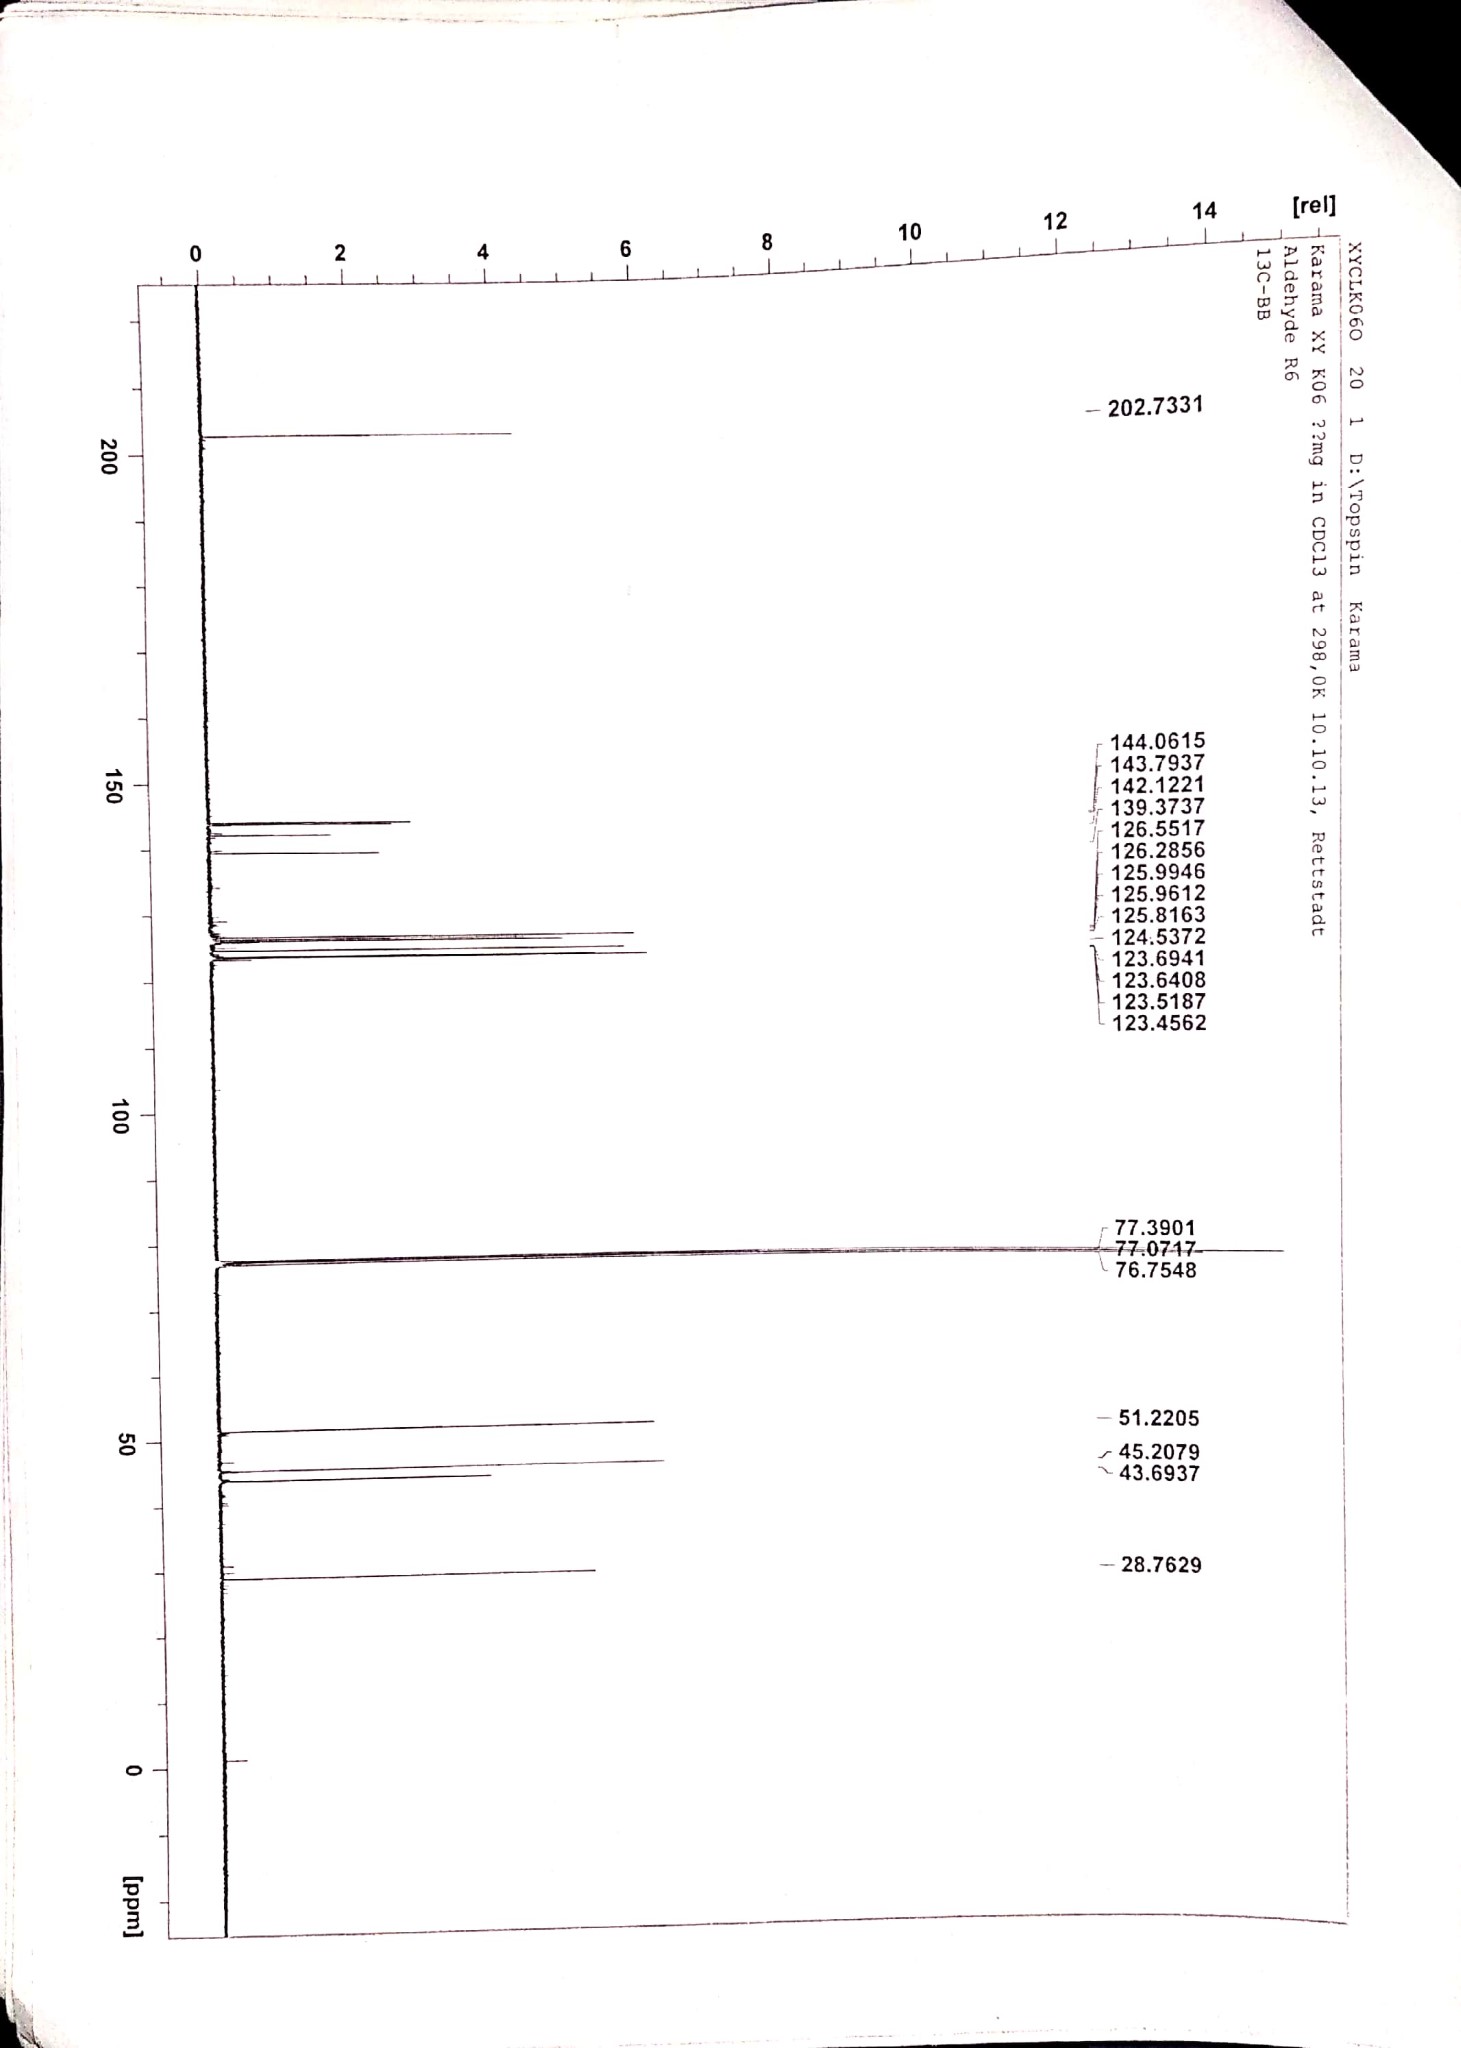
**

**Fig. S6.** 13C-NMR spectrum of the **2b**


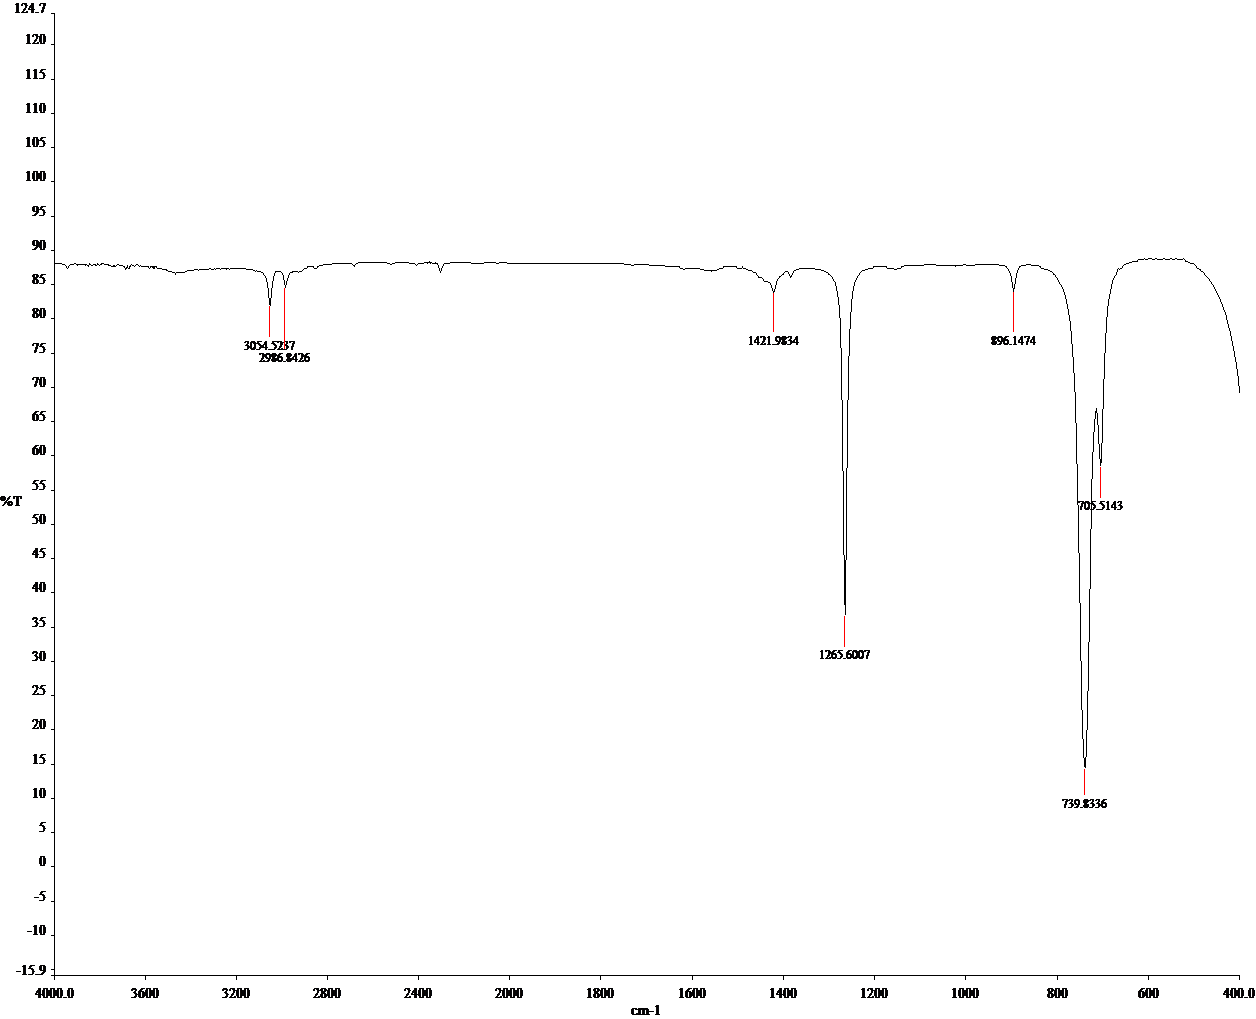


**Fig S7.** IR Spectrum of the compound **1.**


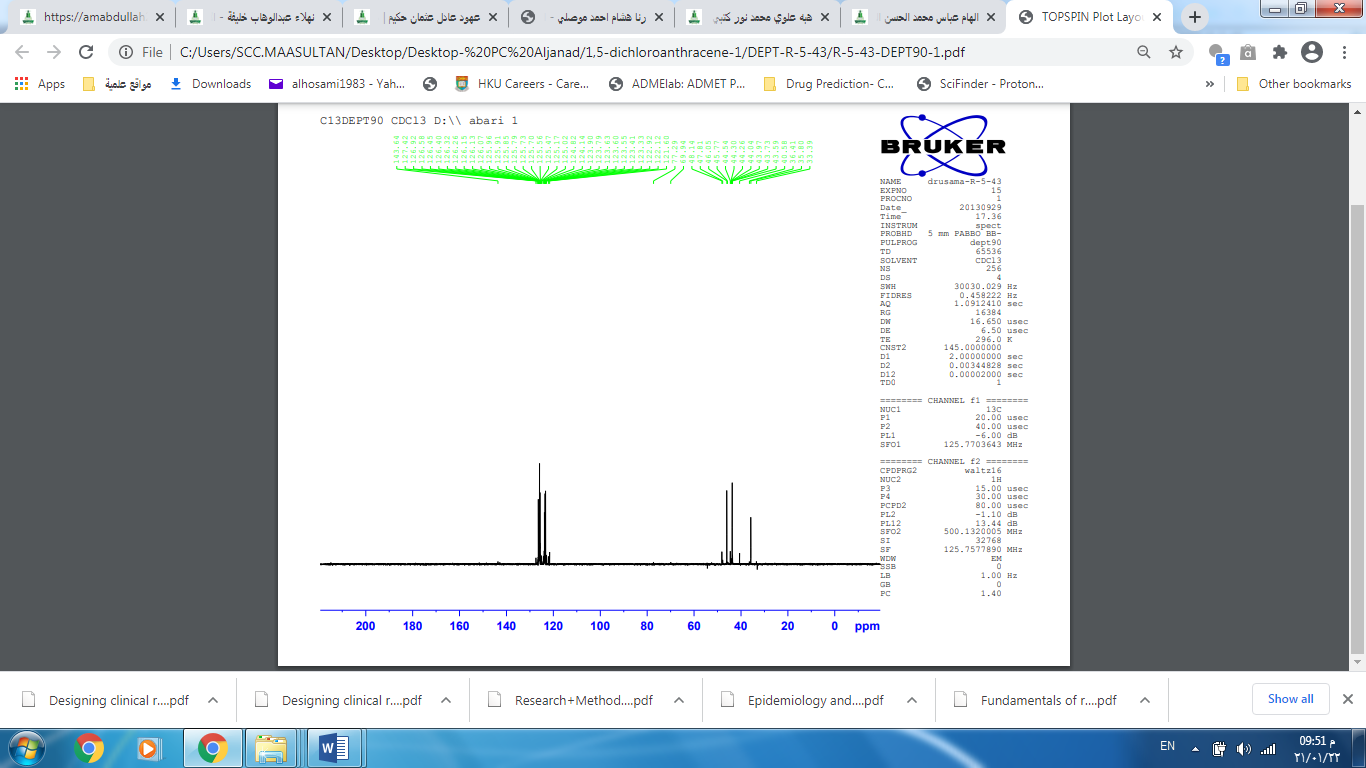

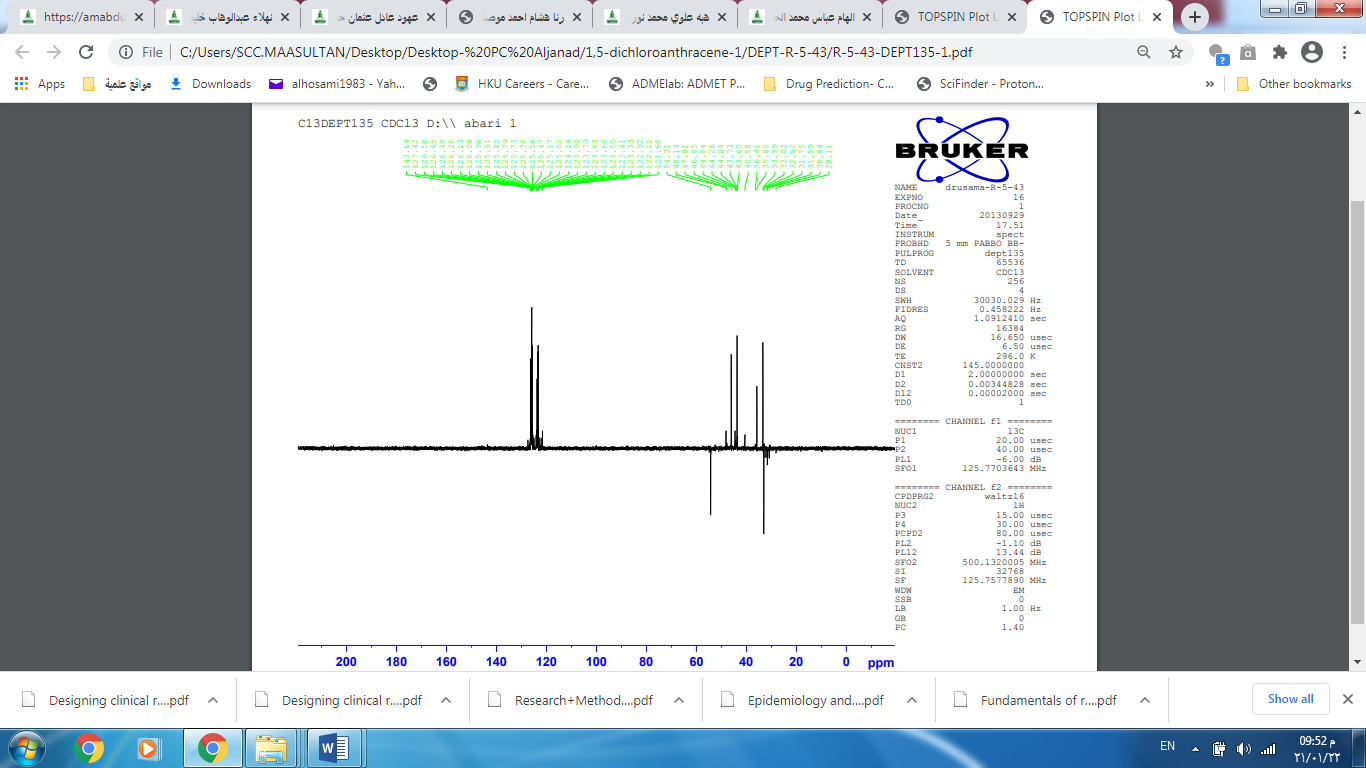


**Fig S8.** DEPT90 Spectrum of the compound **1. Fig S9.** DEPT135 Spectrum of the compound **1.**


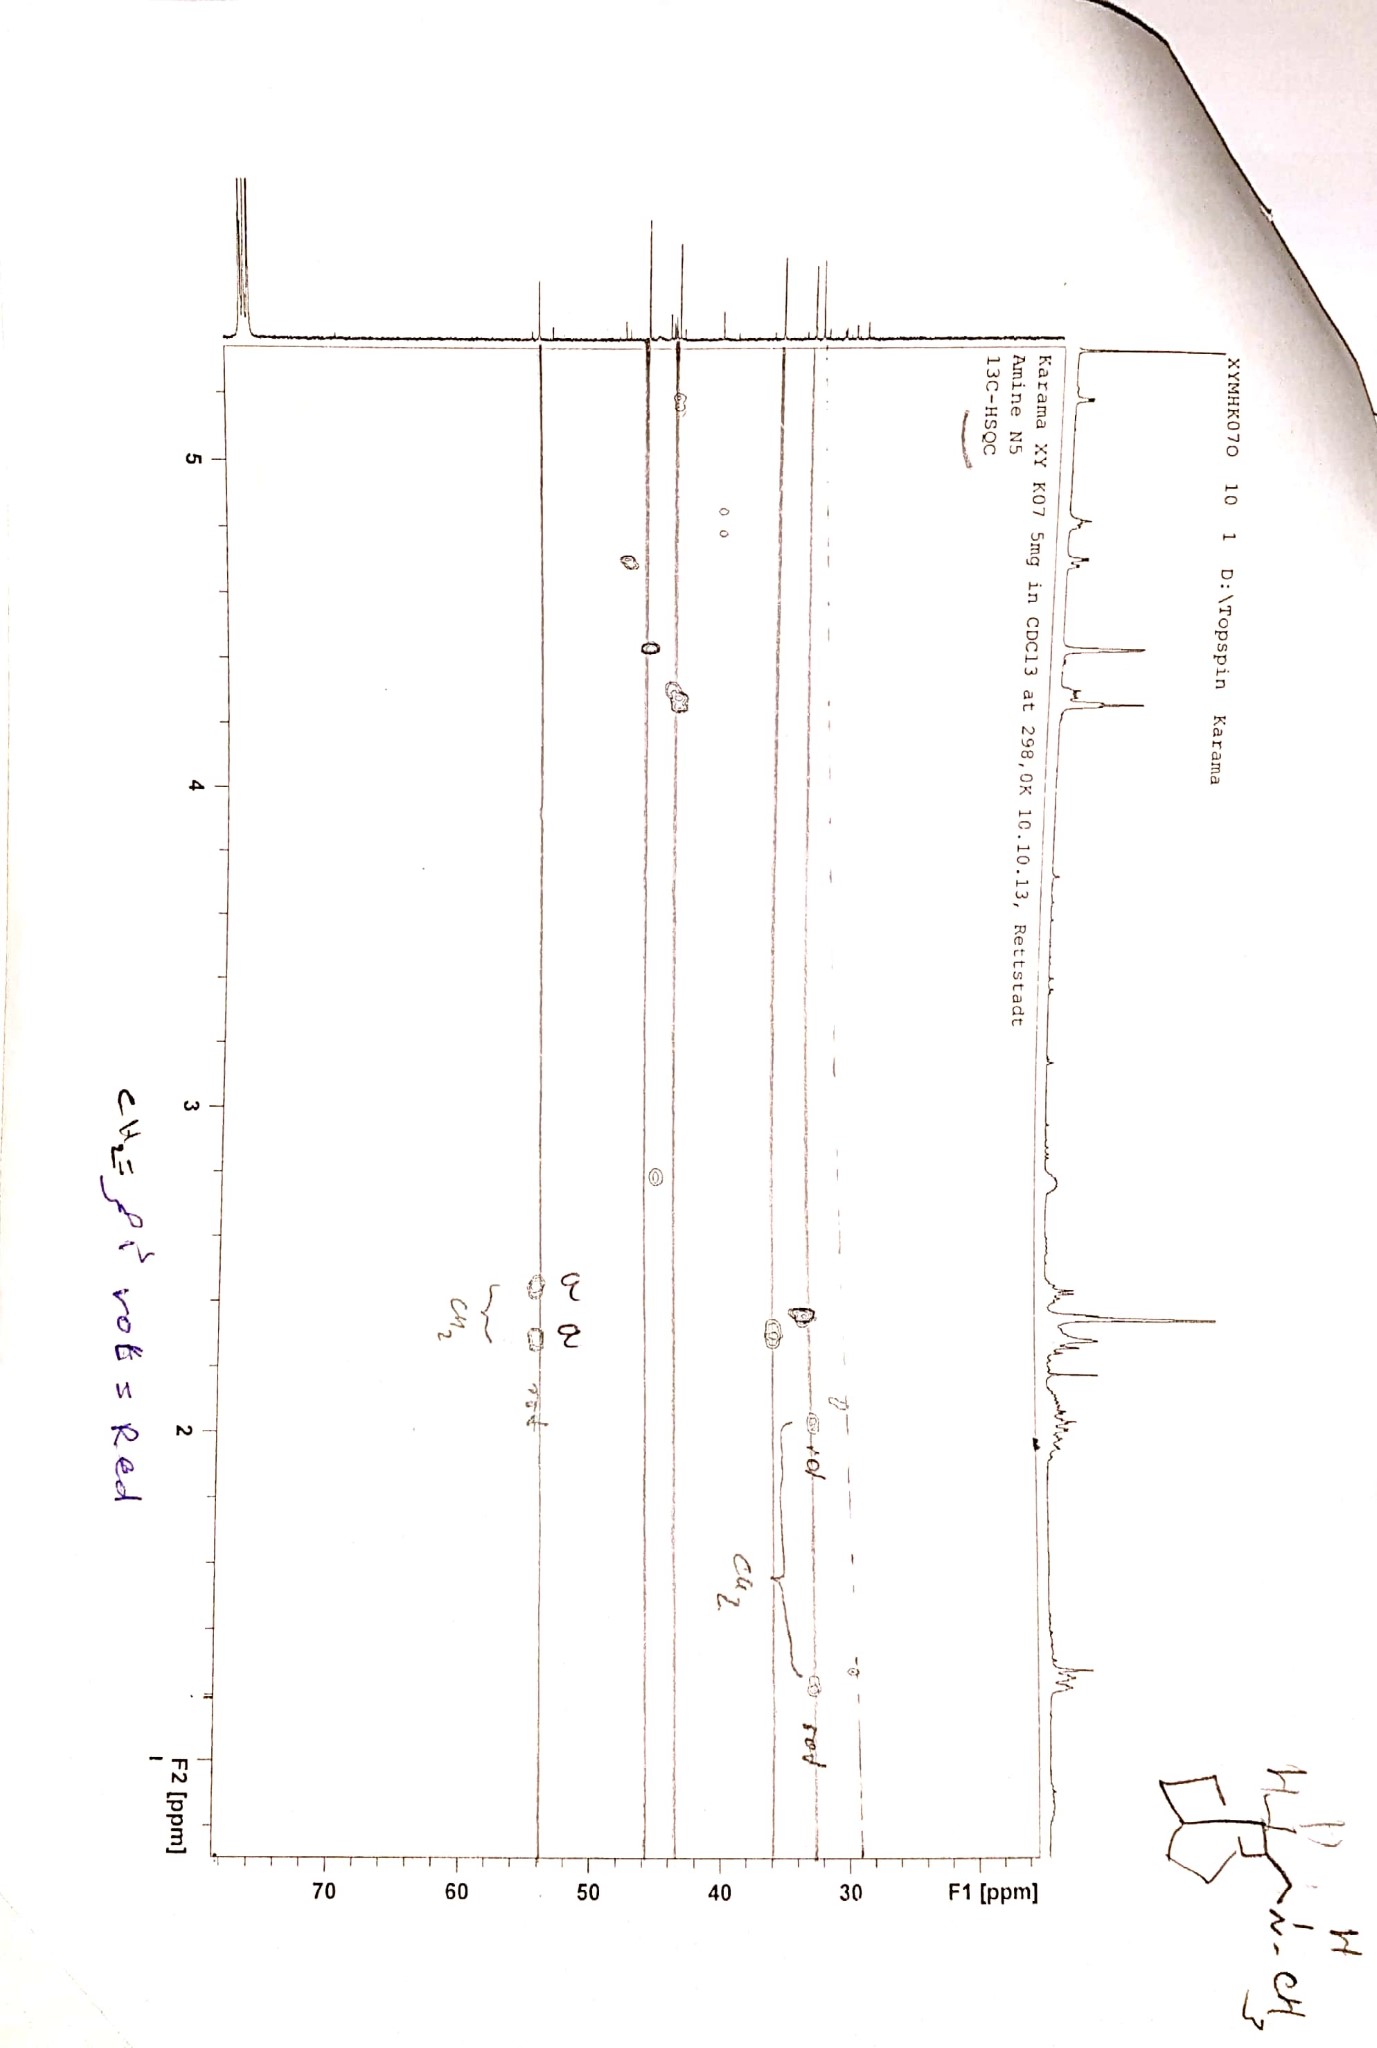
**Fig. S10.** HSQC spectrum of the compound **1.**

**Fig. S11.** a)1H-NMR spectrum of the compound **5,** b) Partial1H-NMR of trans isomer **5** at vinylic protons (-CH=CH-), c) Partial1H-NMR of trans isomer **5** at bridgehead protons (H-C9, H-C10) and methylene (-O-**CH2**-CH3) as quartet signals of both isomers **5** (cis/ trans)


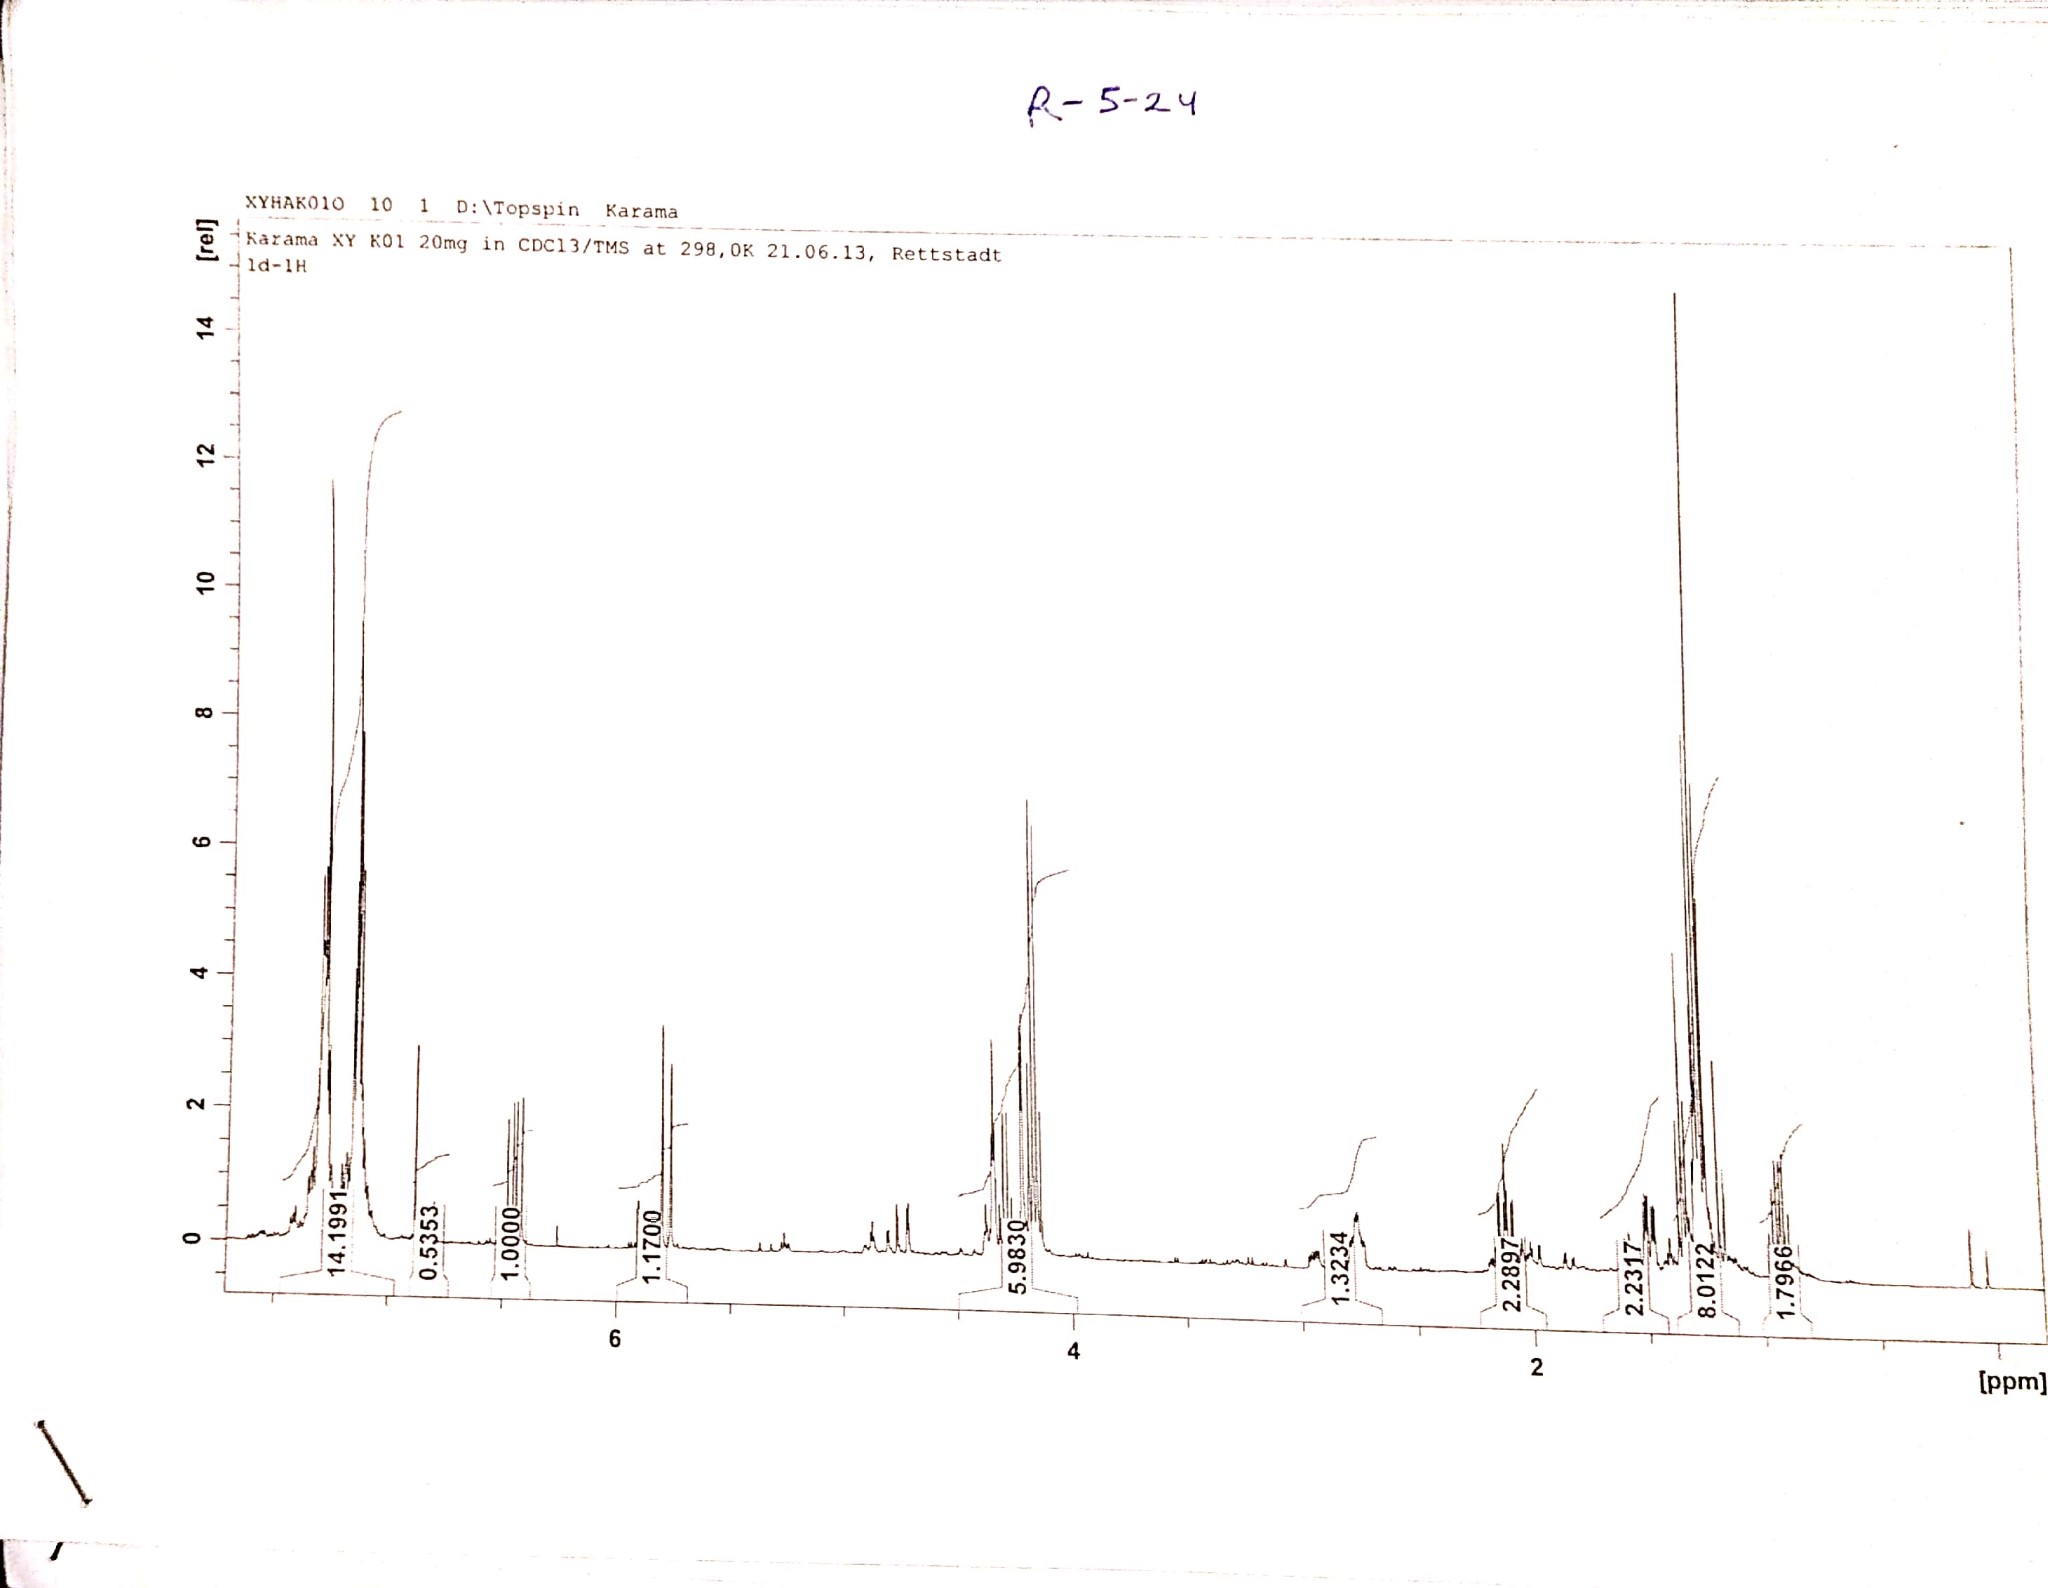

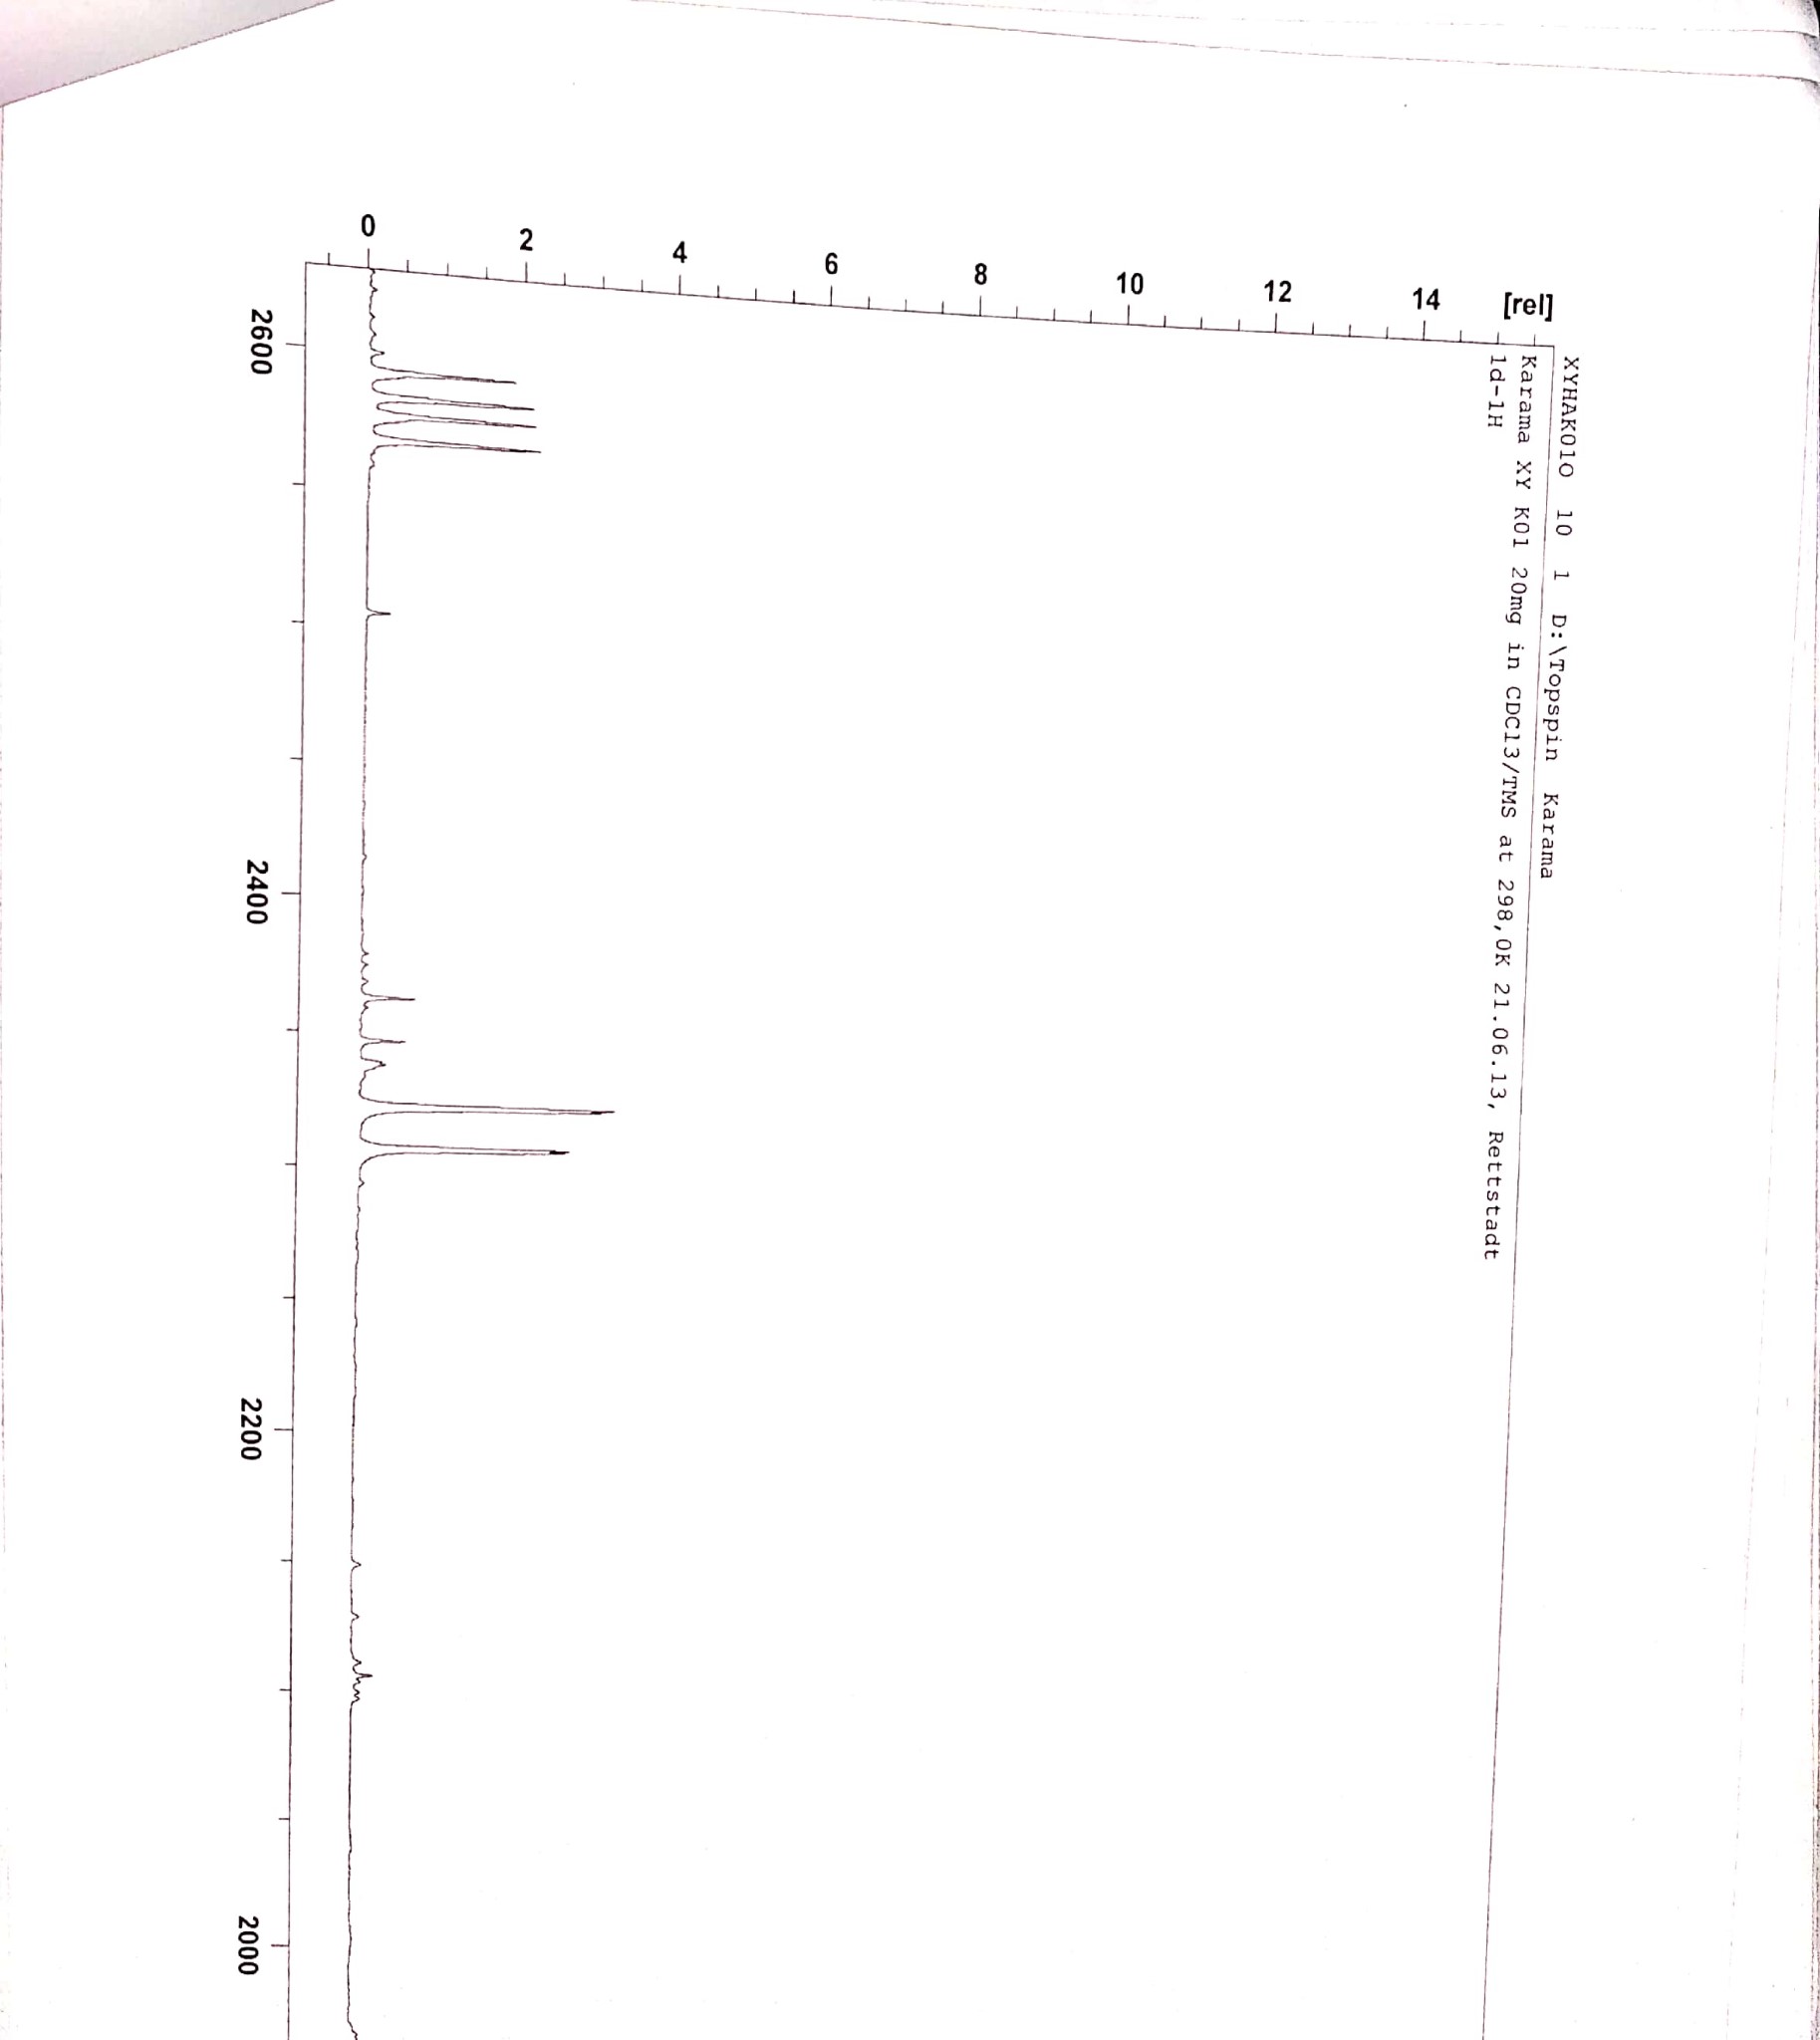

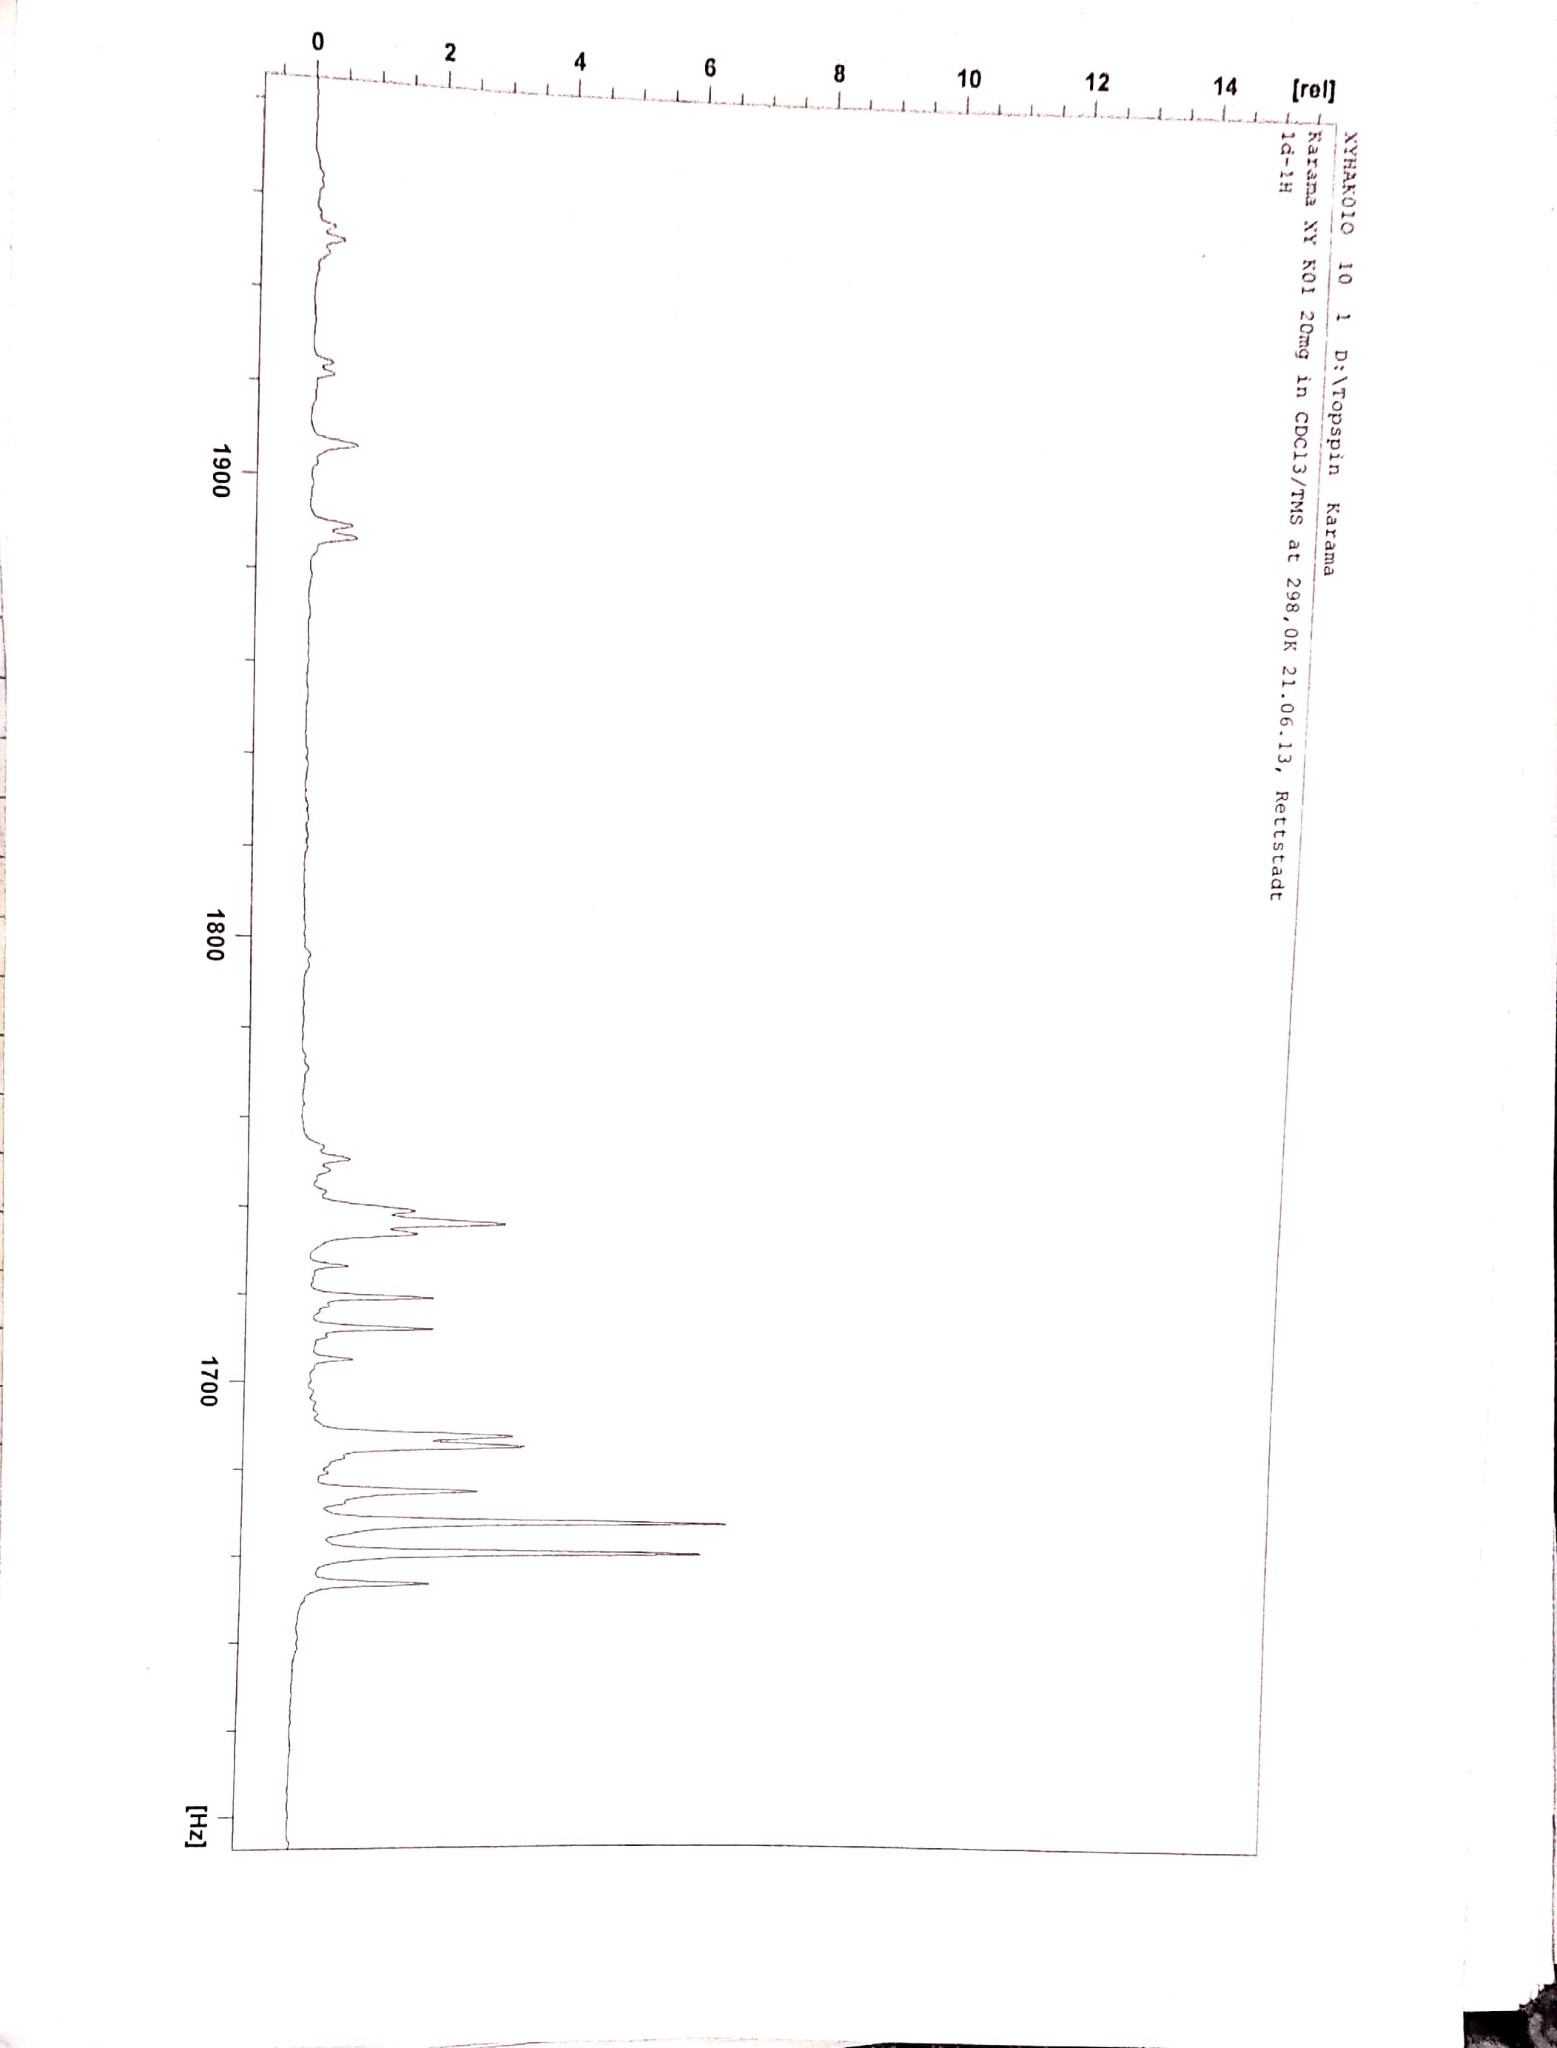


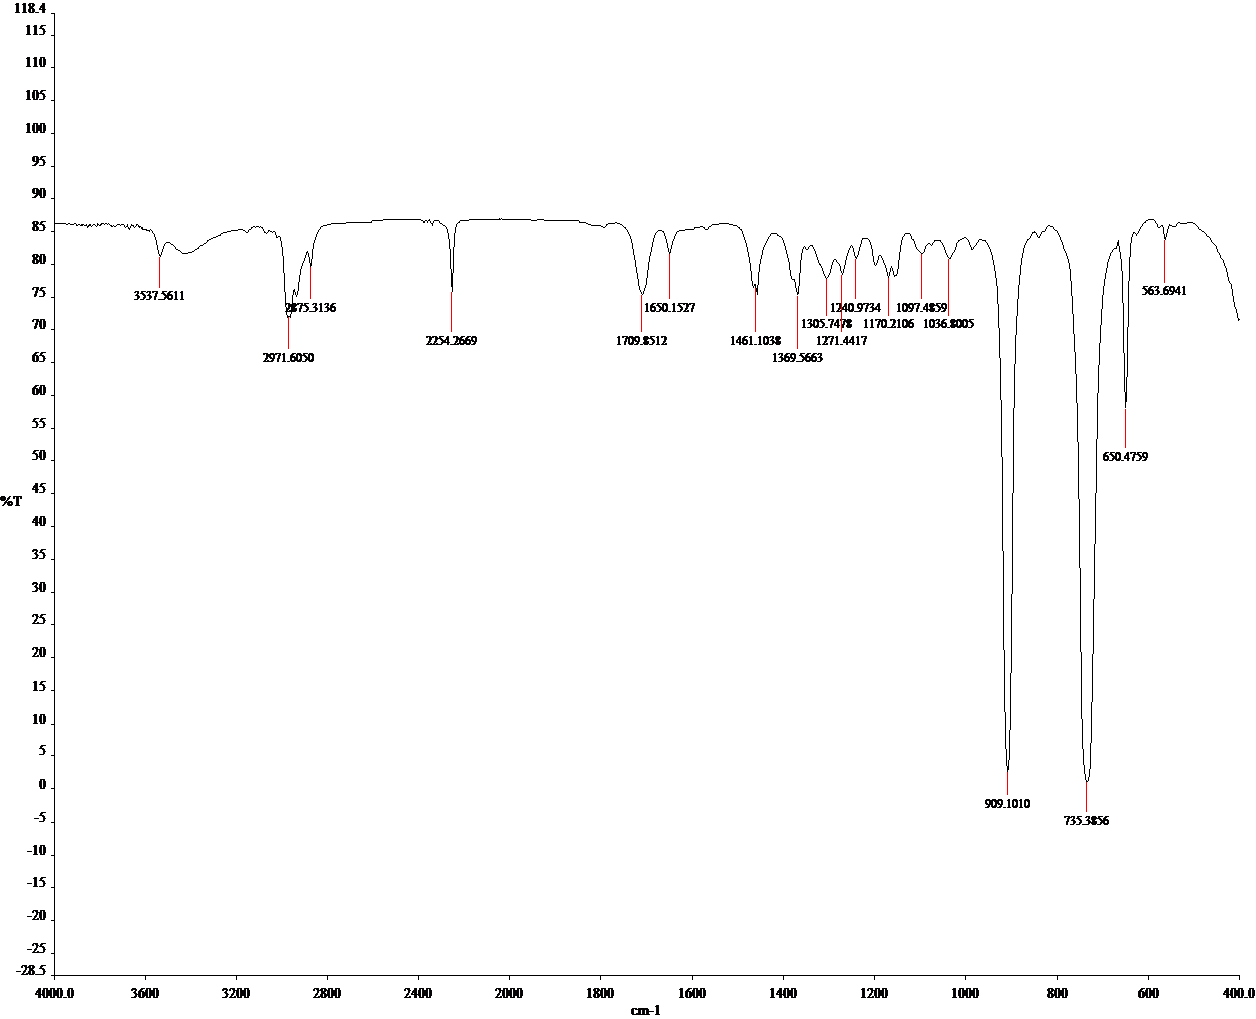


**Fig. S12.** IR spectrum of the compound **5**


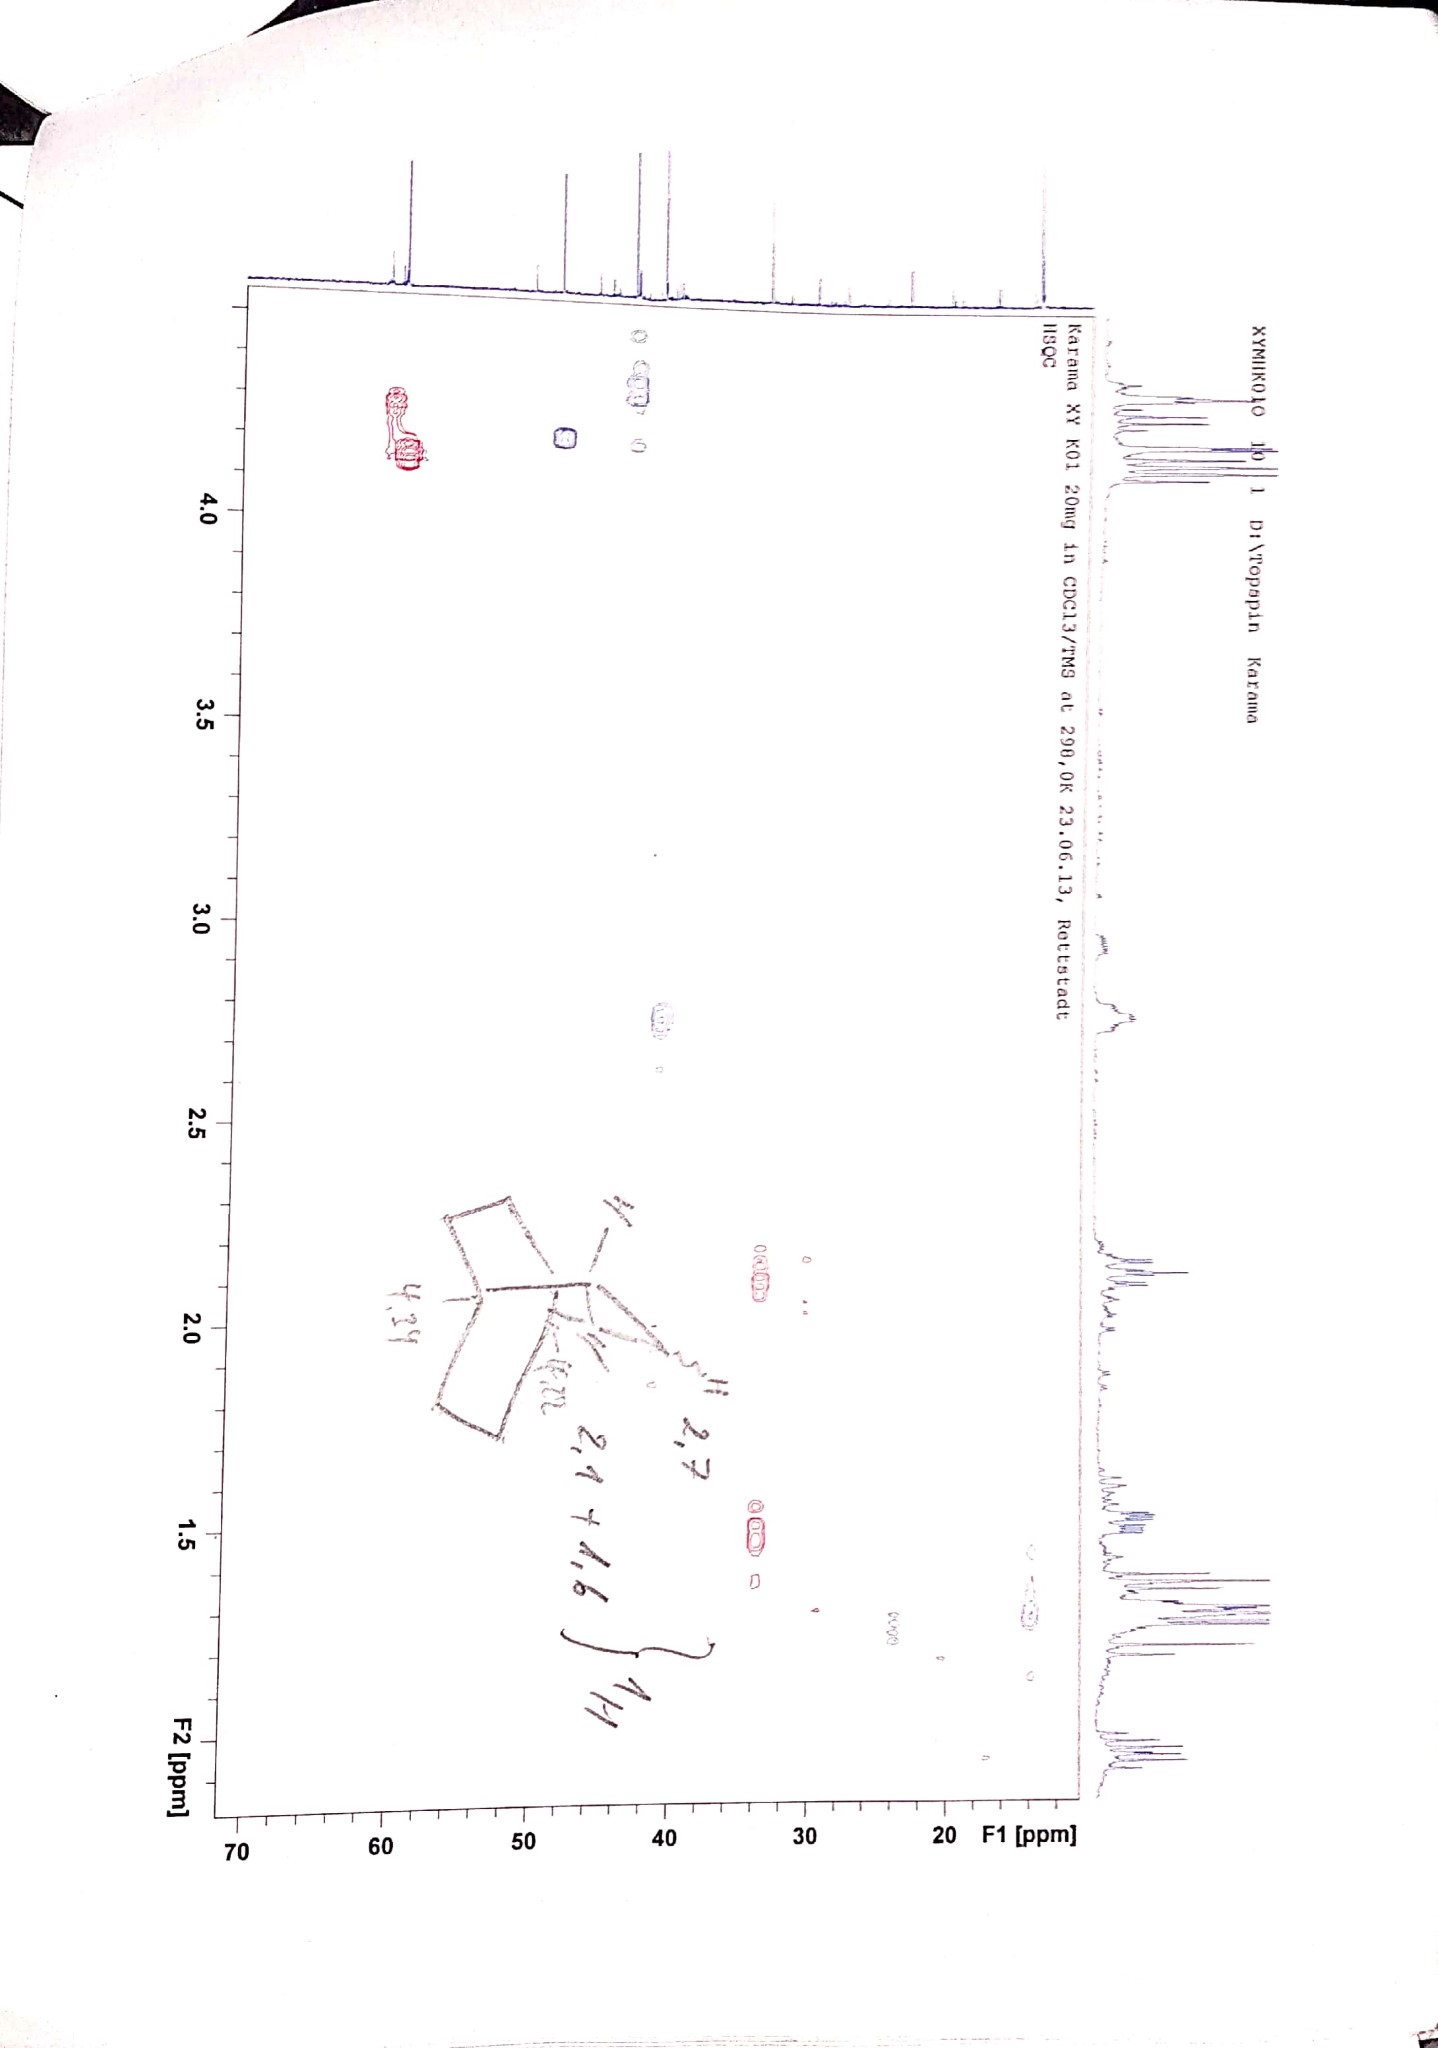


**Fig. S13.** HSQC spectrum of the compound **5**

**Fig. S14.** 1H-NMR spectrum of the compound **6**


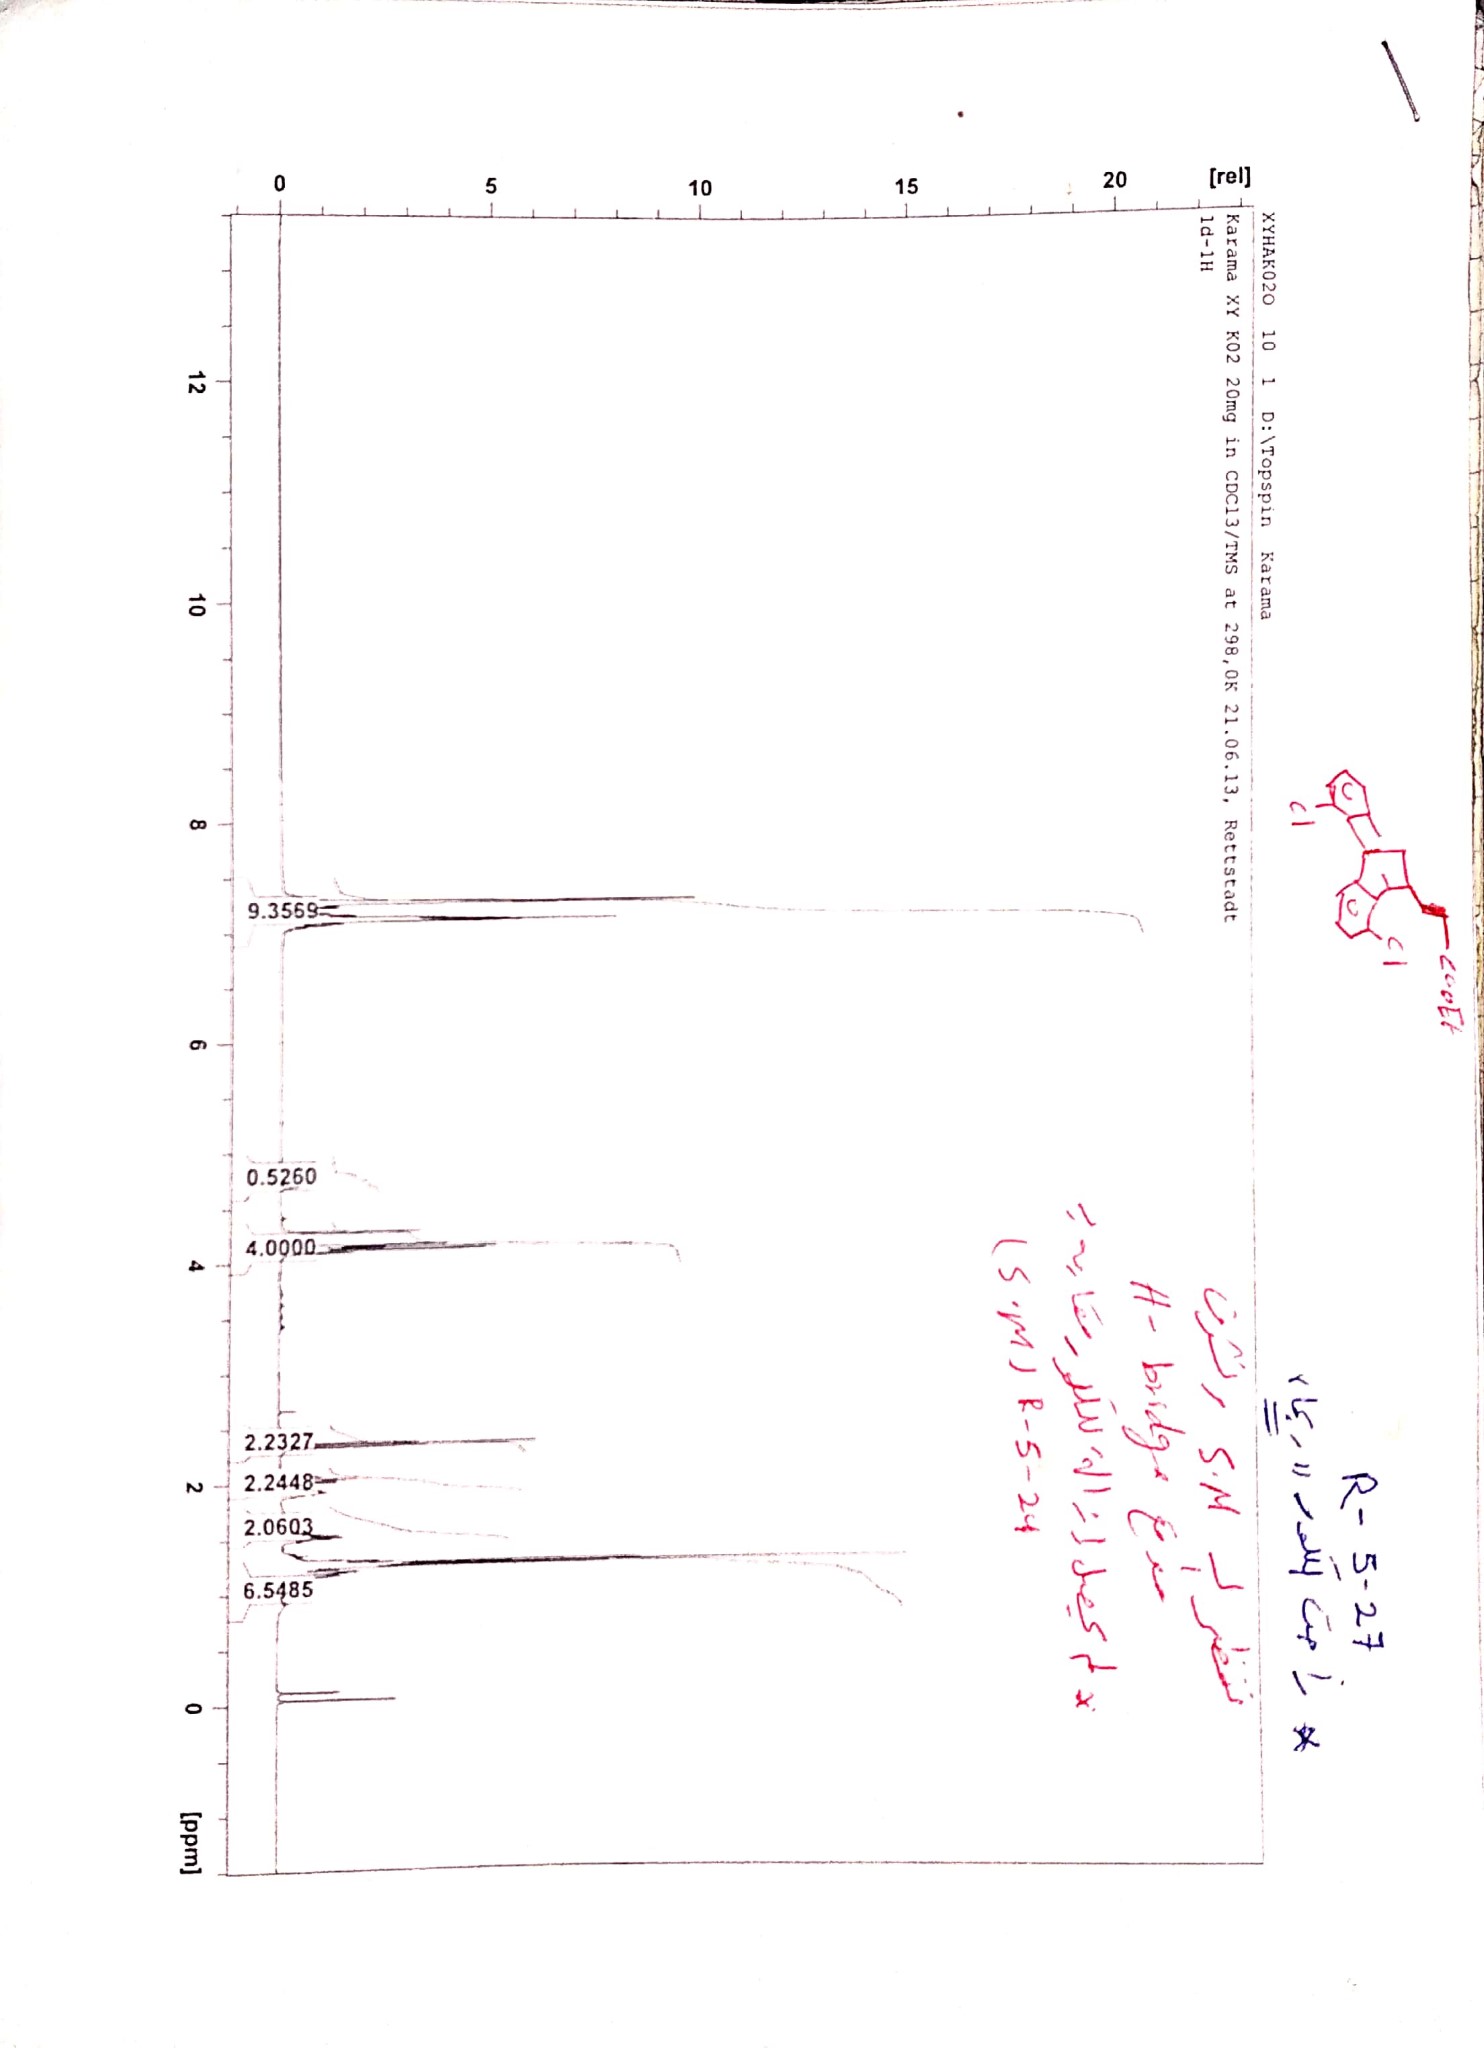

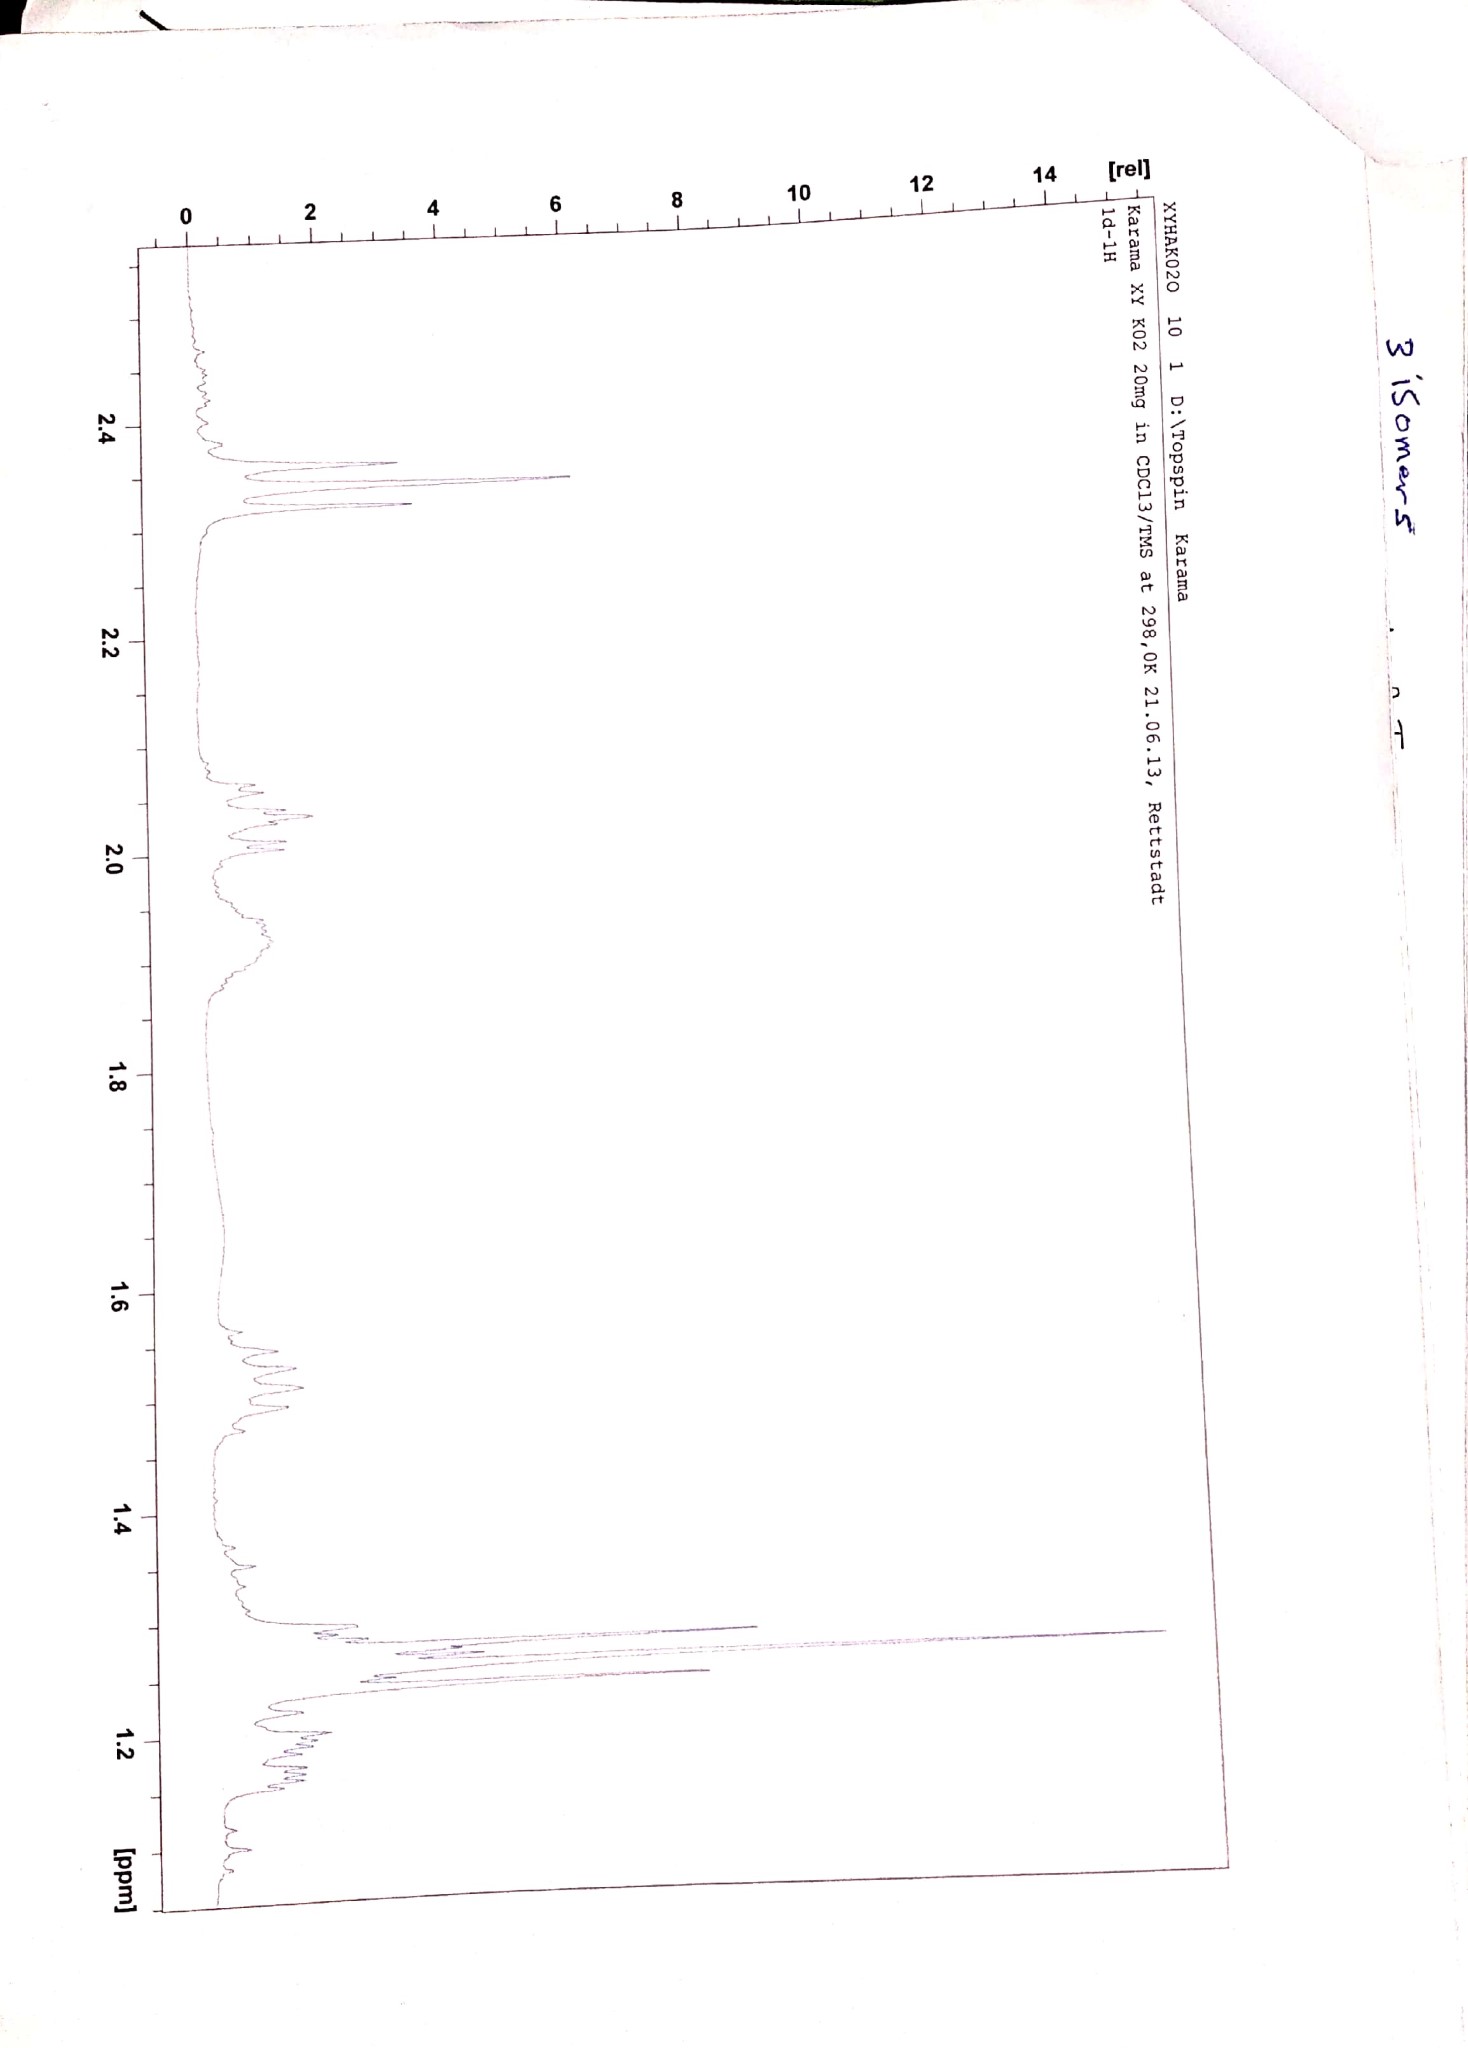

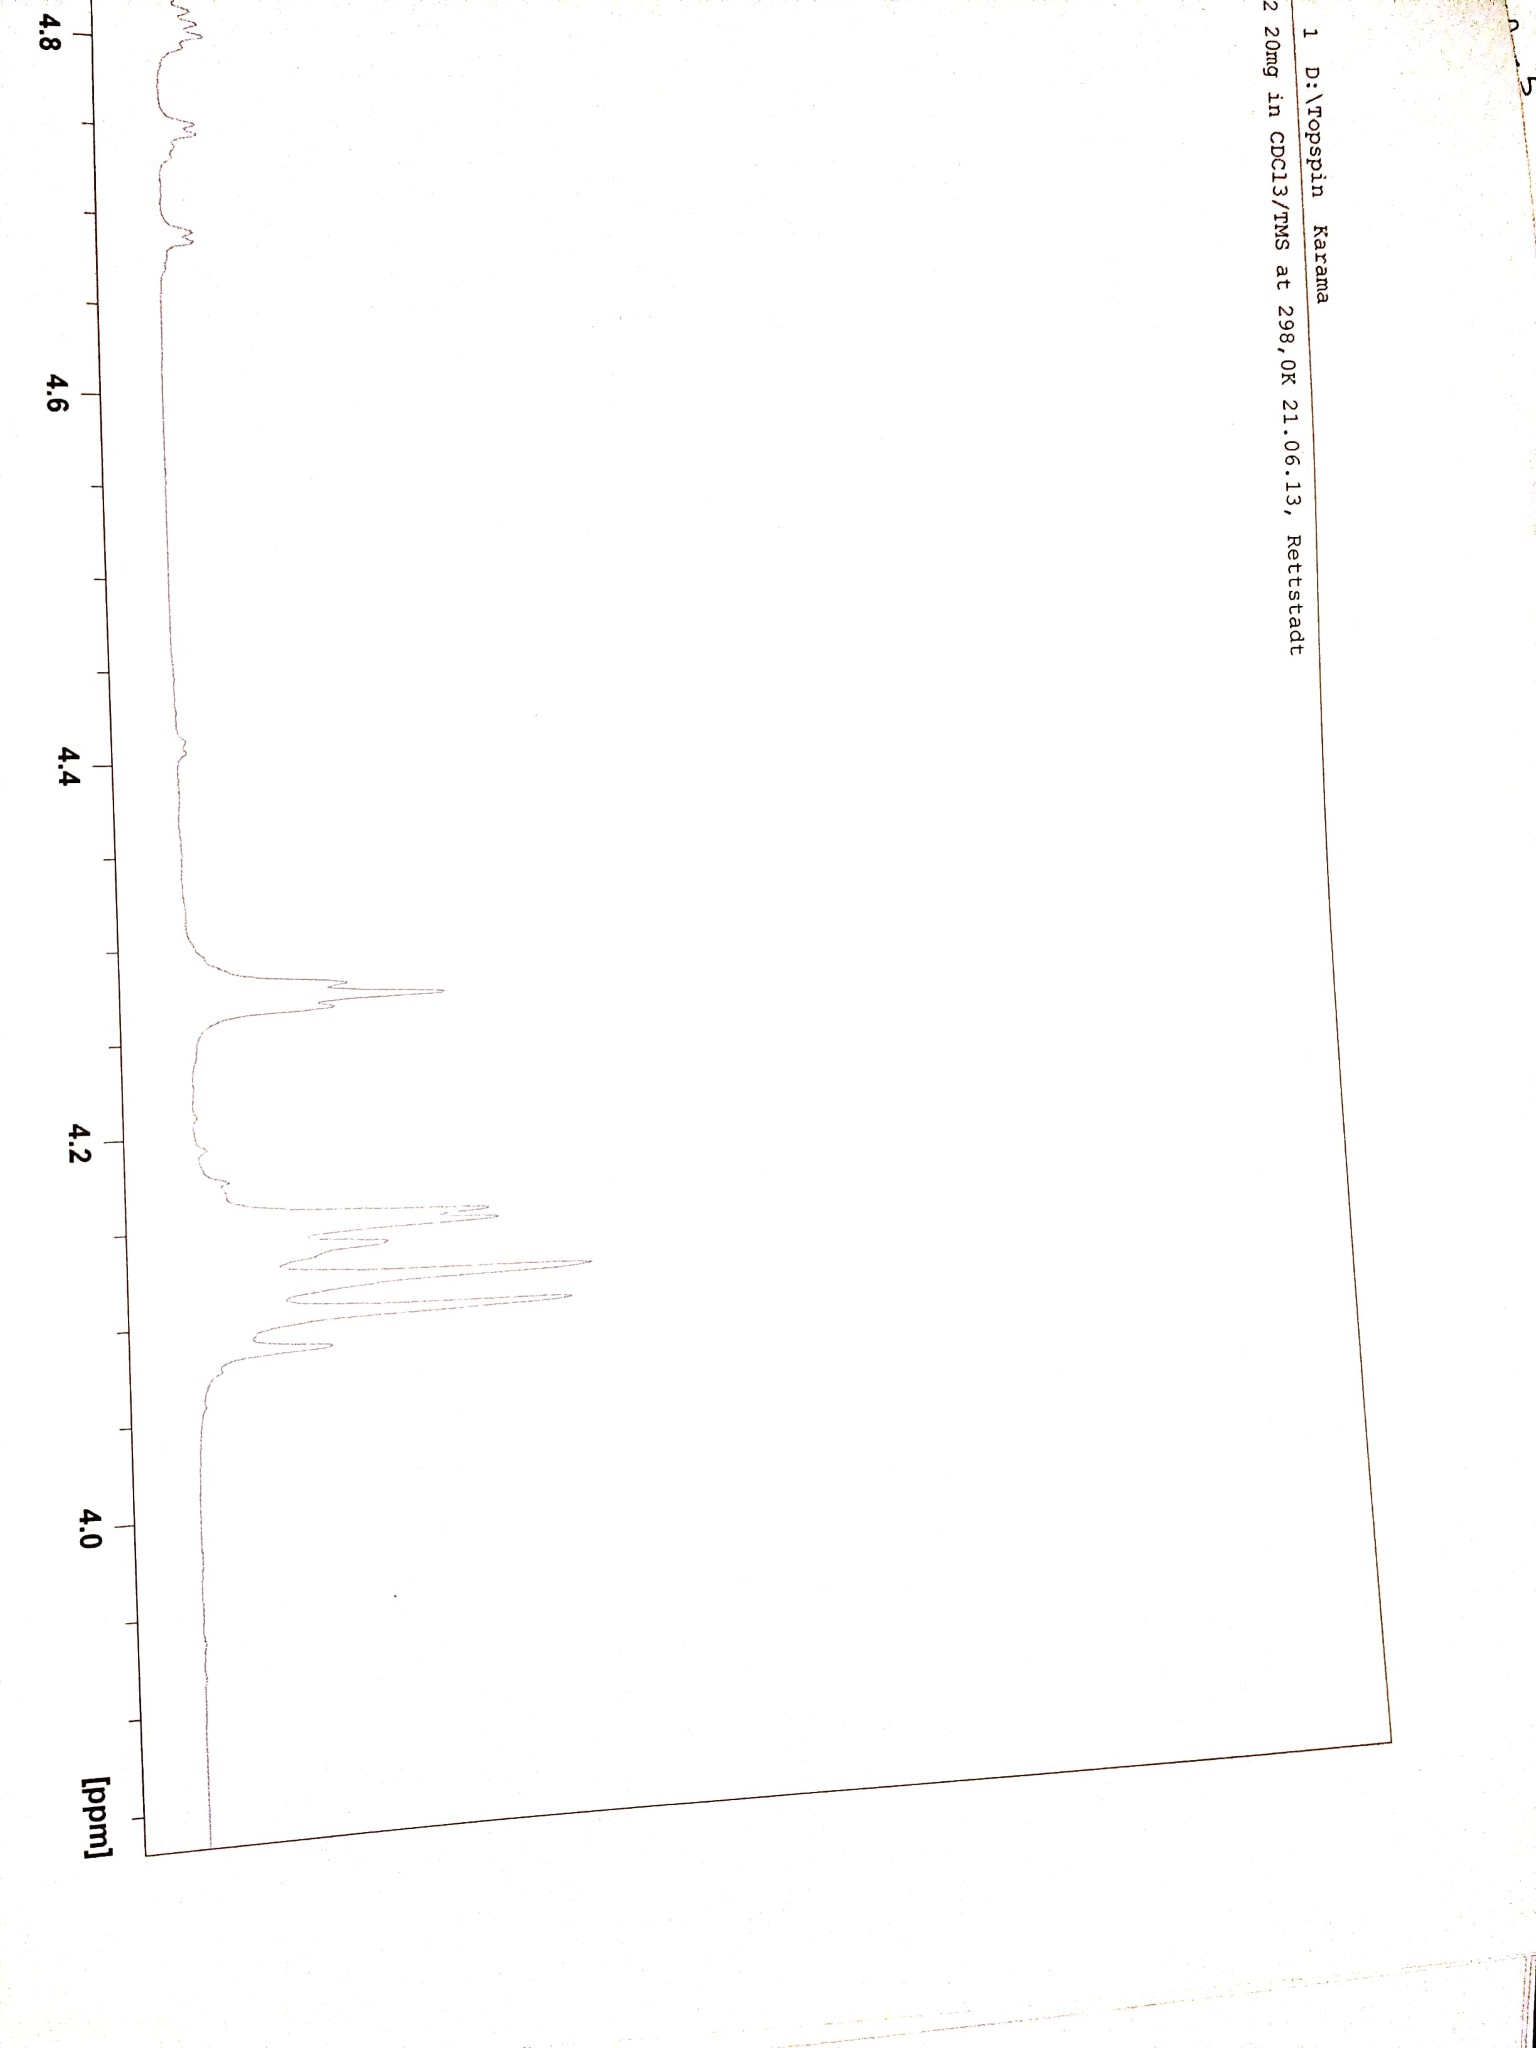


**
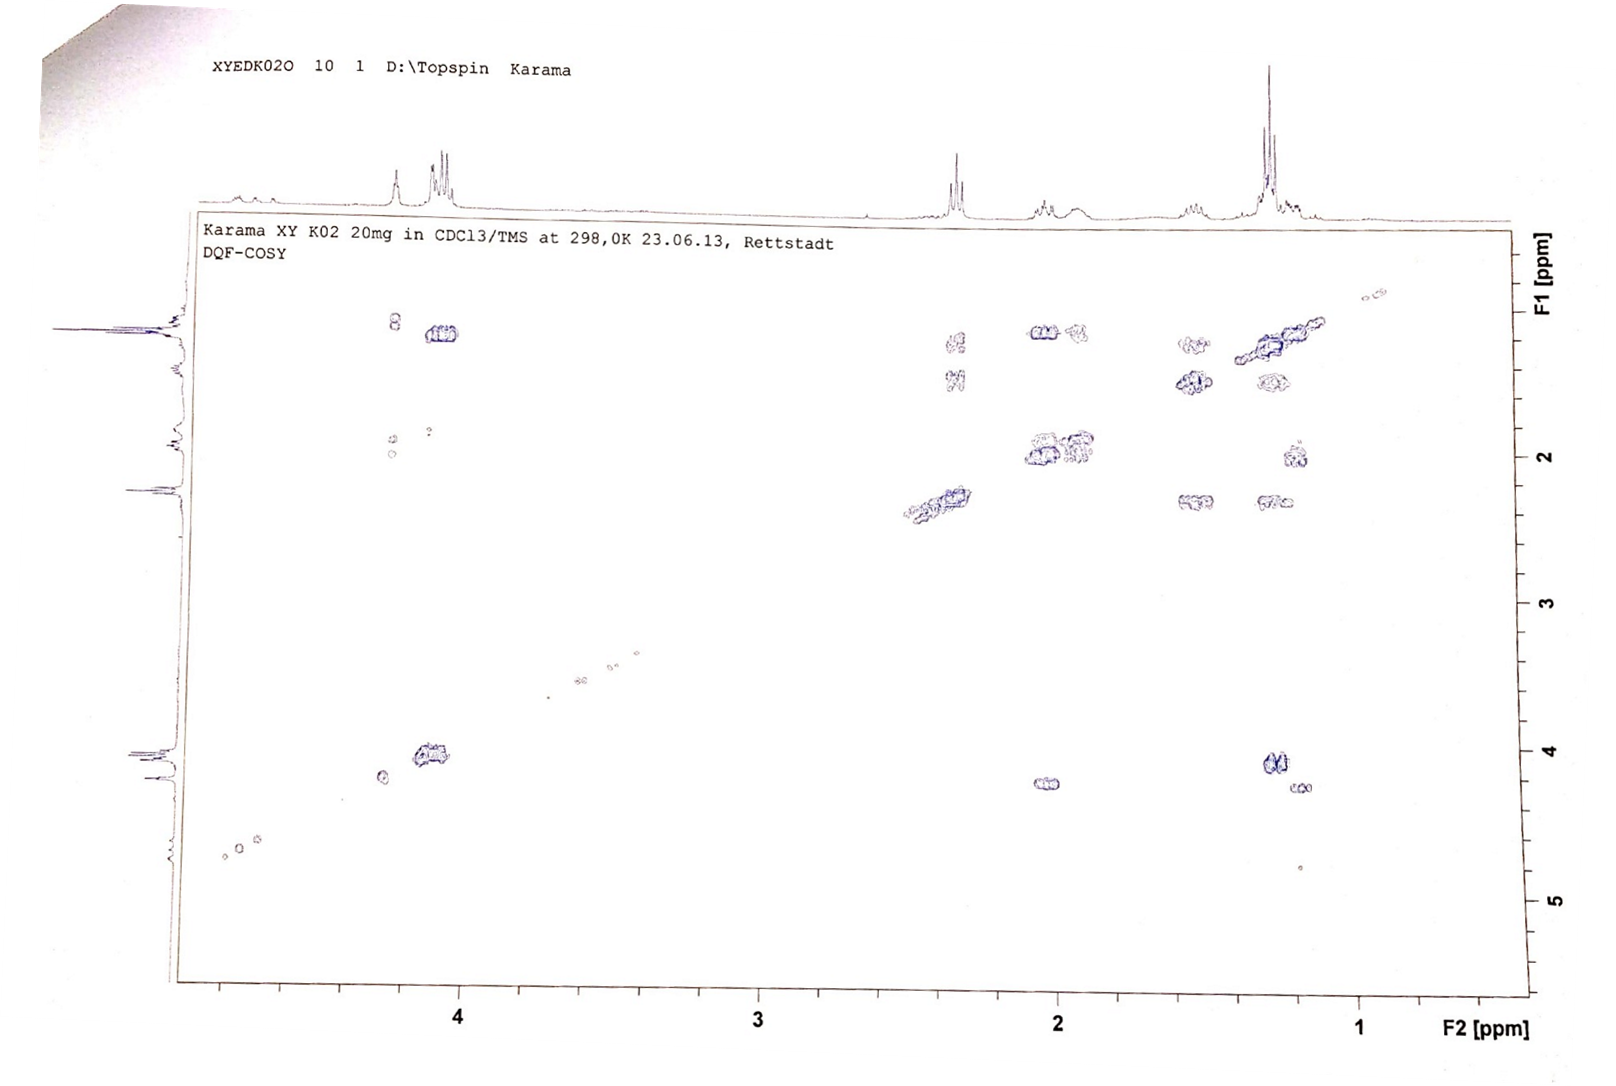
Fig. S15.** 1H-1H COSY spectrum of the compound **6**

**
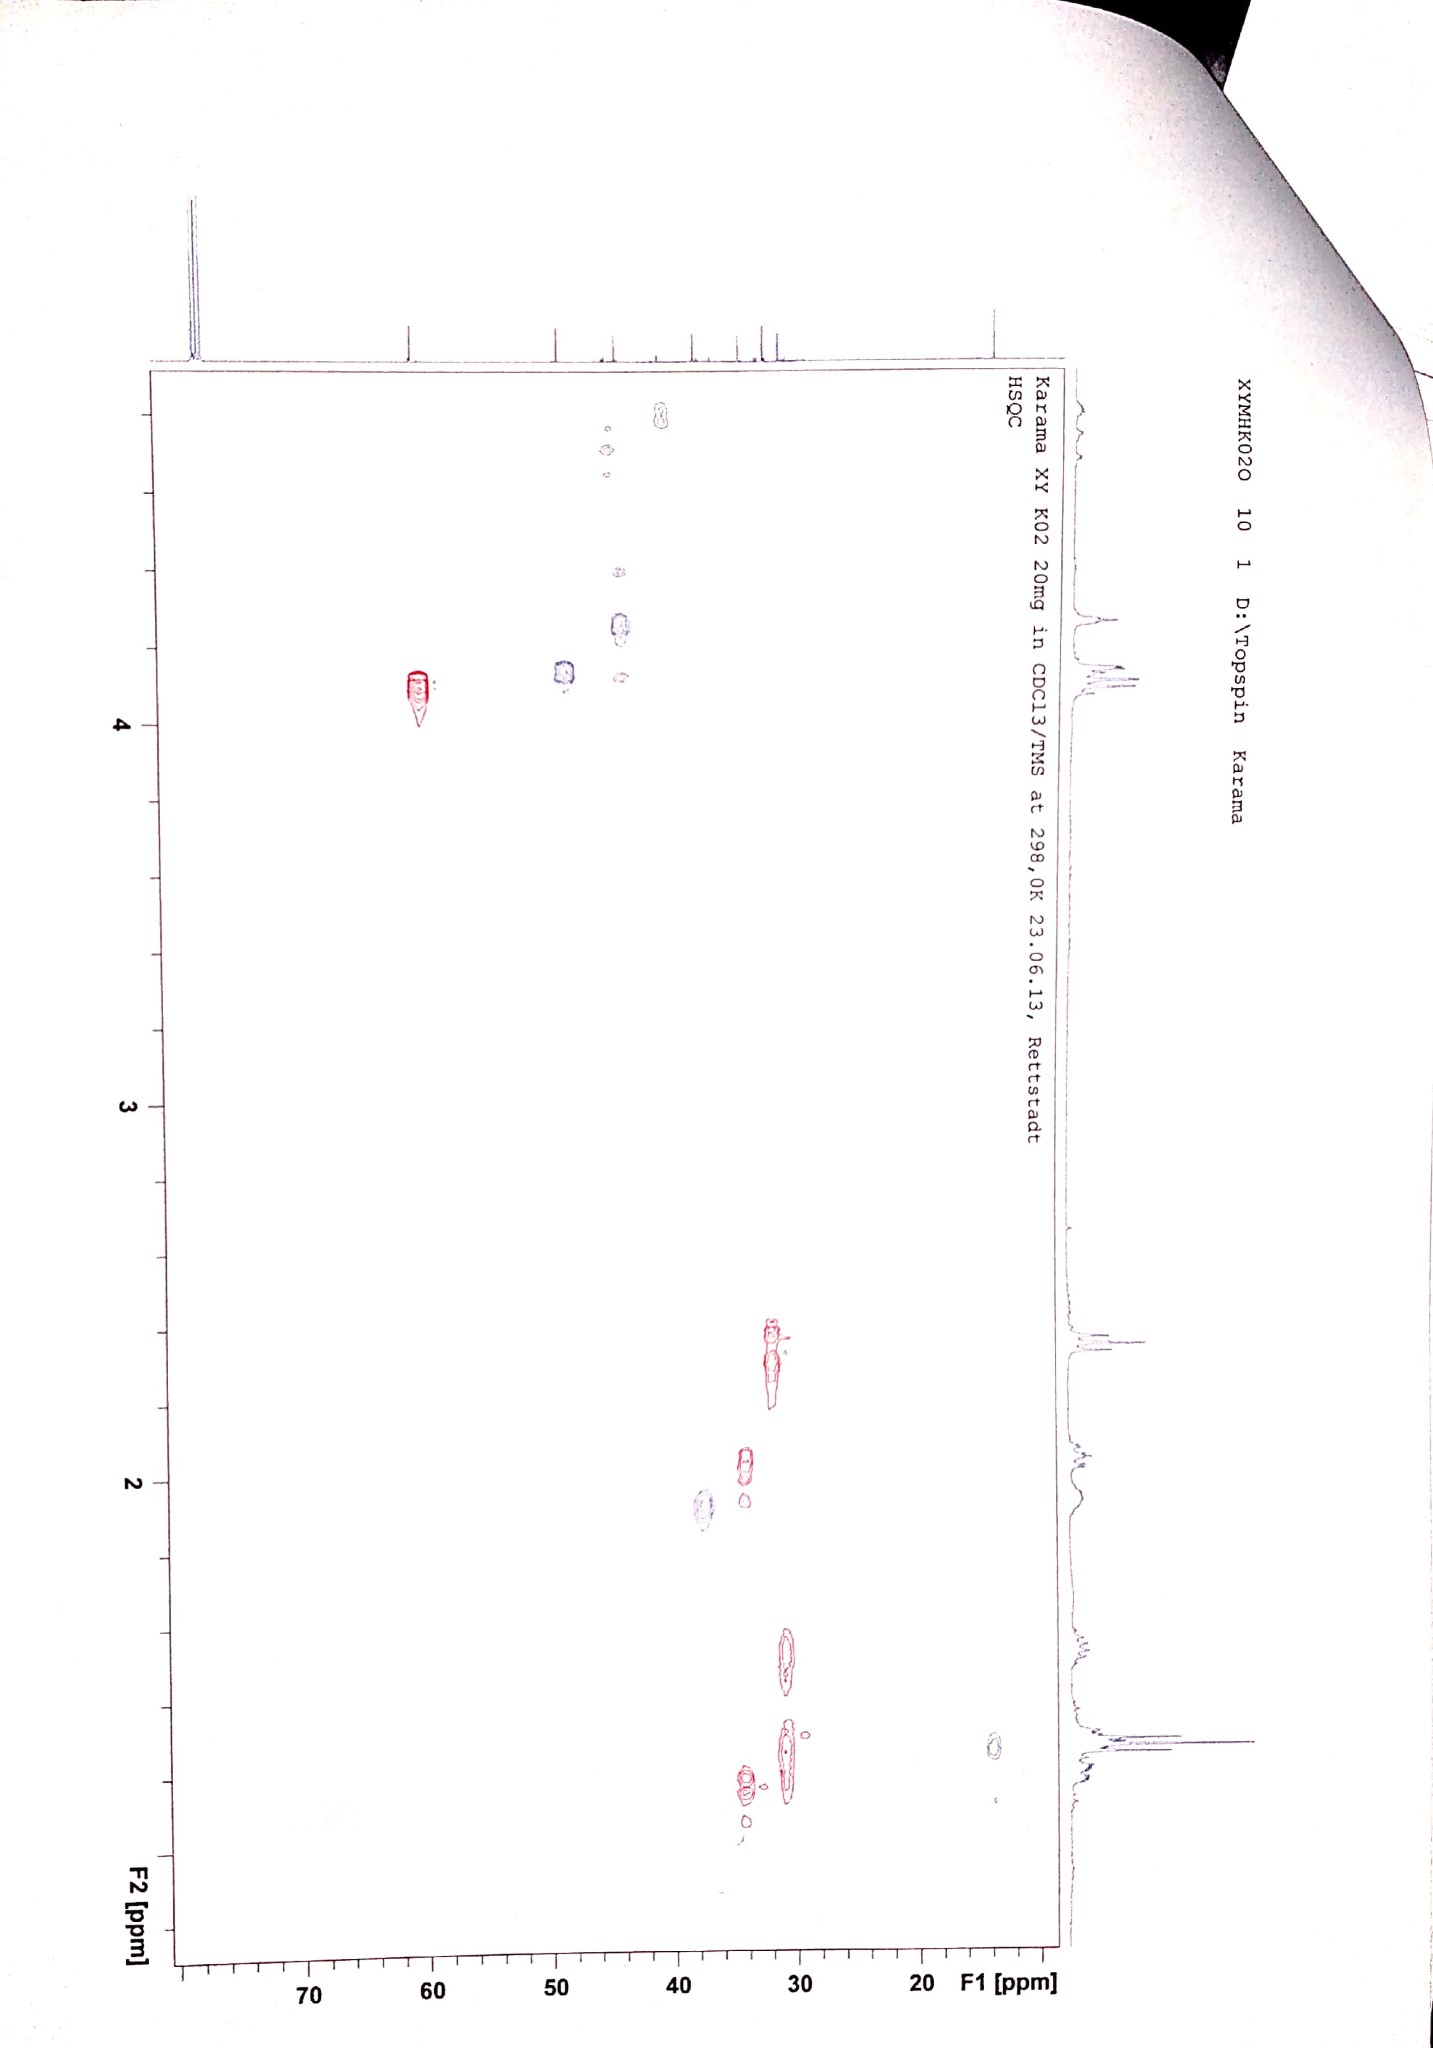
**

**Fig. S16.** HSQC spectrum of the compound **6**

**
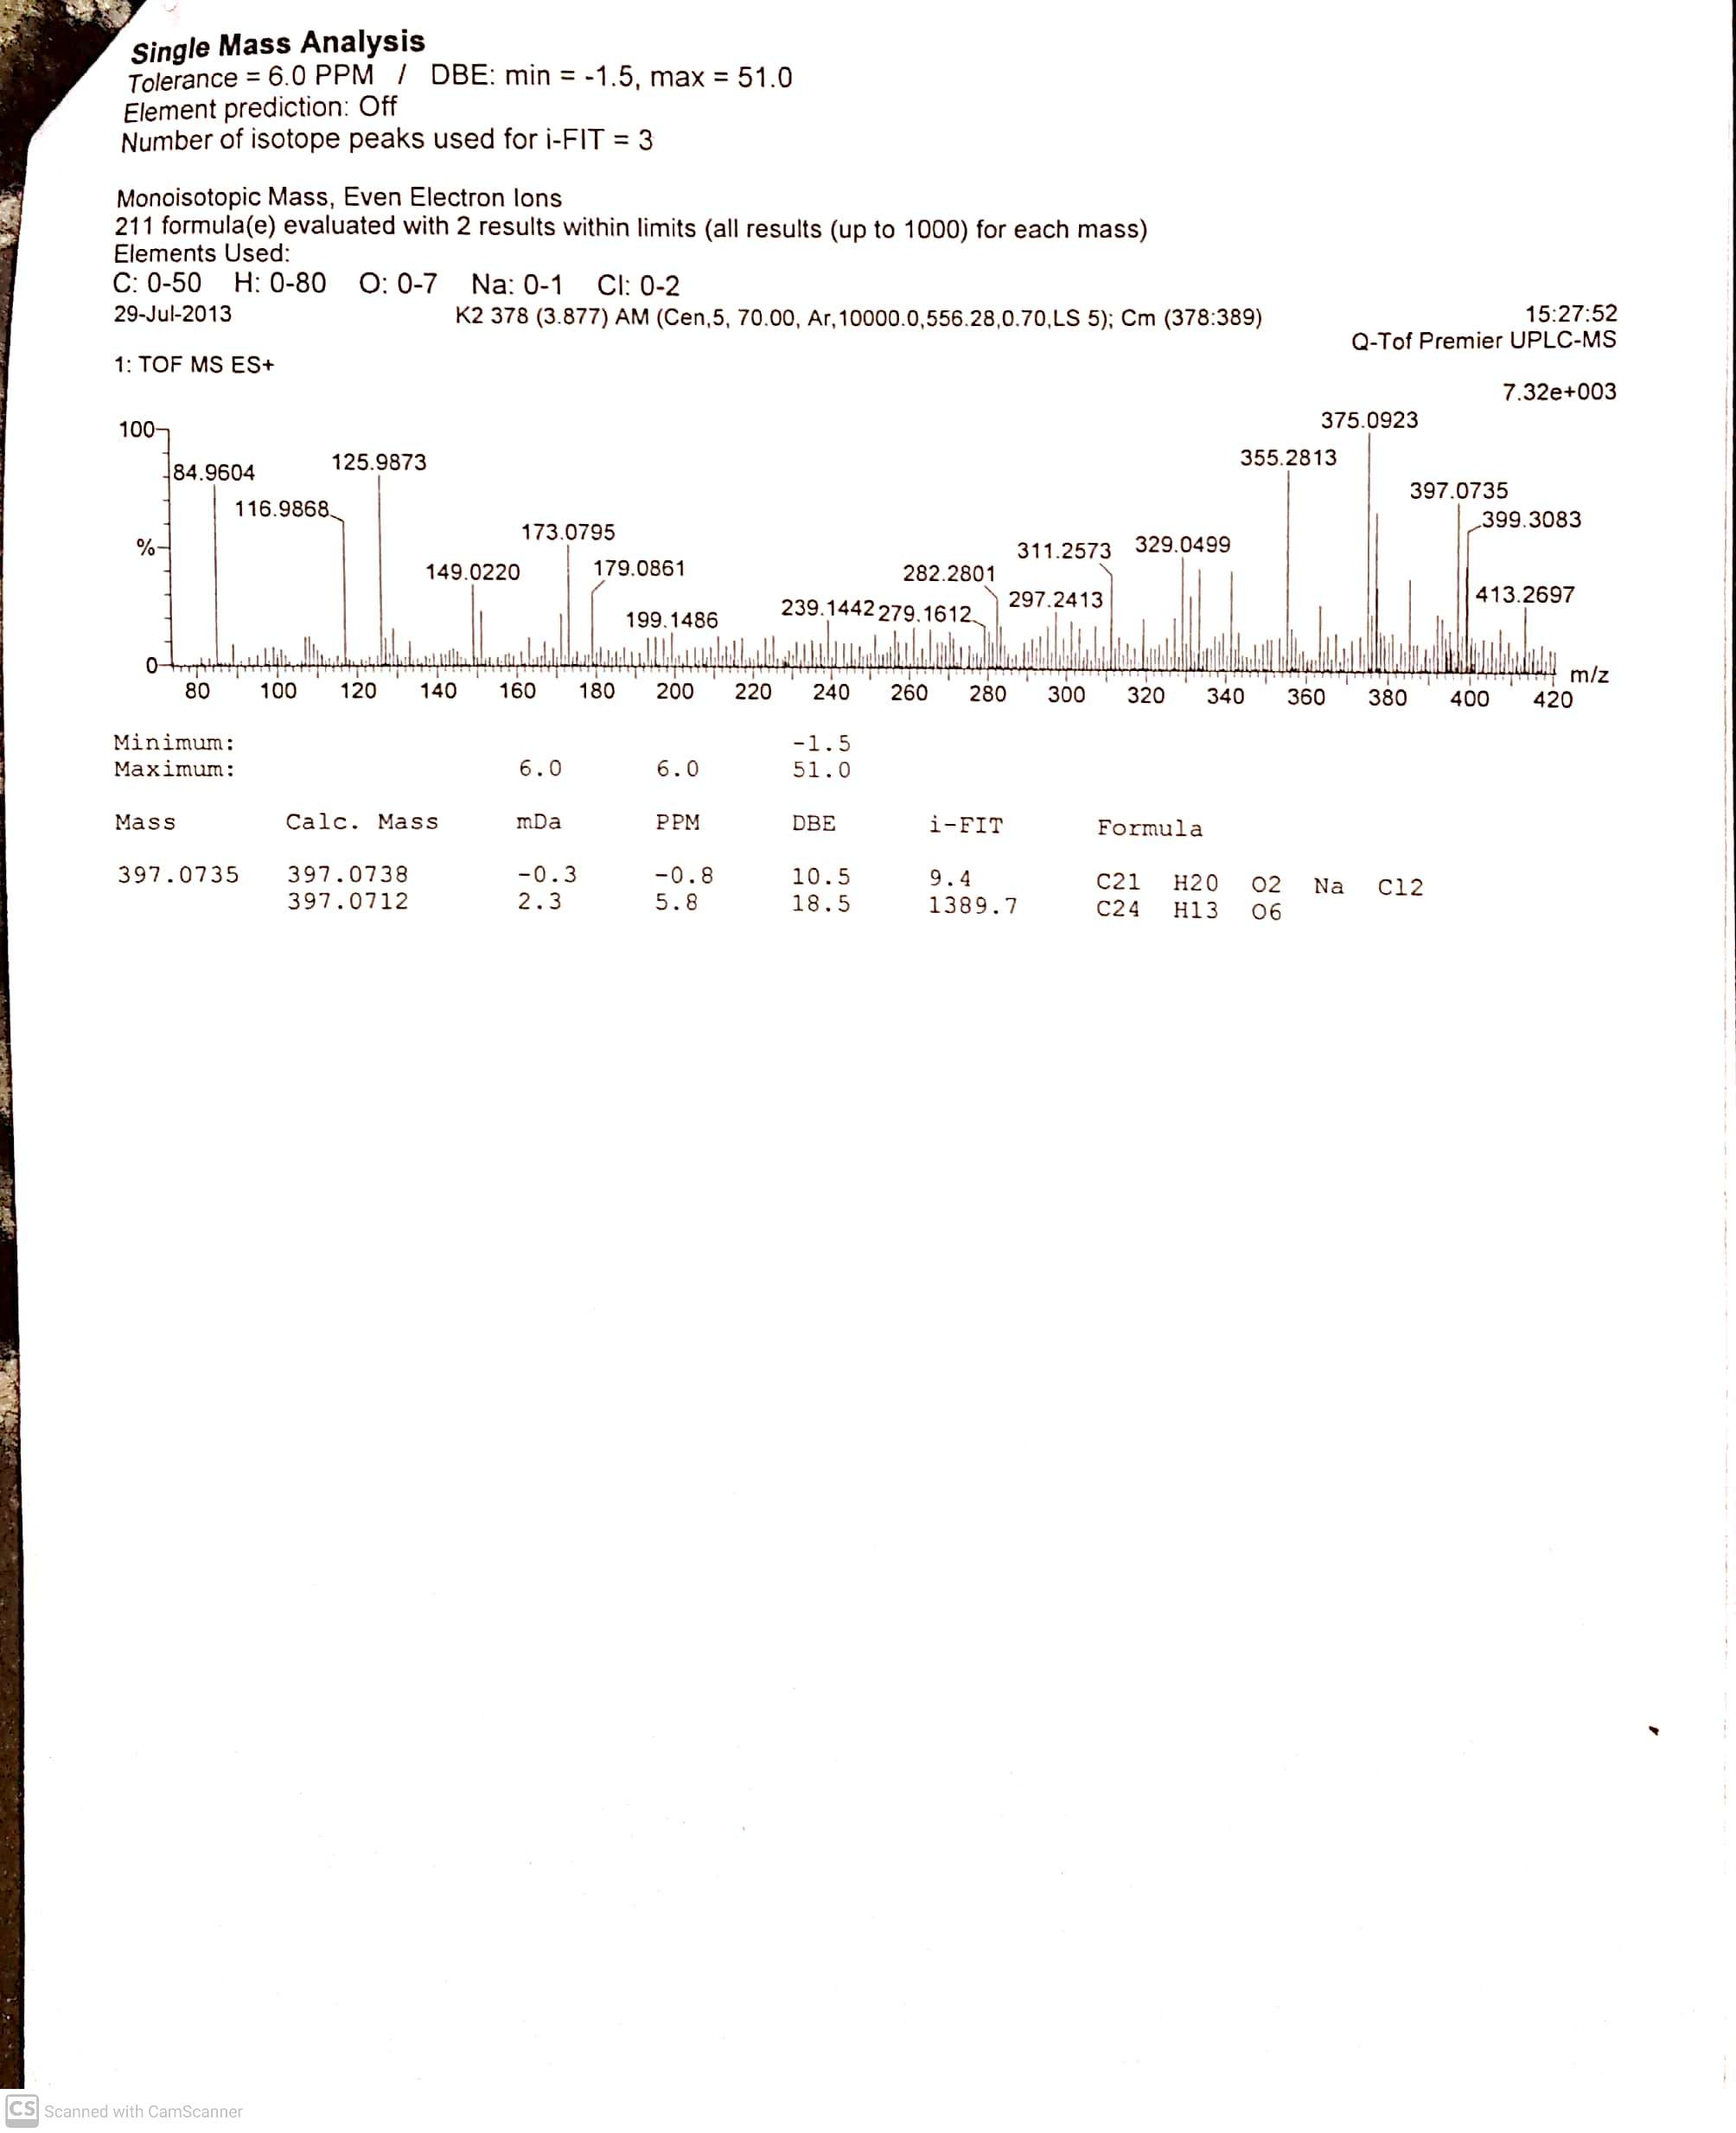
**

**Fig. S17.** HRMS of the compound **6**
